# Supplementary material for: Systems Analysis of Transcriptomic and Proteomic Profiles Identifies Novel Regulation of Fibrotic Programs by miRNAs in Pulmonary Fibrosis Fibroblasts
Source: PubMed Central journal article supplement (PMC6316743; doi:10.3390/genes9120588), 2018-11-29
Supplement: genes-09-00588-s001.pdf [file genes-09-00588-s001.pdf]

## Supplementary Materials and Methods

### *Study population and cell culture*

Primary fibroblasts were cultured from lung tissues of patients with SSc or IPF who underwent lung transplantation at the University of Pittsburgh Medical Center under a protocol approved by the institution's IRB. Primary fibroblasts were also cultured from the lung tissues of normal donors whose lungs were not used for transplantation. Culture of lung fibroblasts was previously described [1]. Primary lung fibroblasts were cultured at low passage (passage 2-3 for RNA-seq and miRNA-seq, < passage 7 for additional studies) in Dulbecco's Modified Eagle Medium (DMEM) containing 4.5 g/L glucose, 4 mM L-glutamine, 1 mM sodium pyruvate, 10% fetal bovine serum, penicillin/streptomycin, 0.25 ug/mL Fungizone at 37° C, 5% CO<sub>2</sub>.

### *RNA-seq and miRNA-seq sample preparation and sequencing*

Trizol (Life Technologies) was added directly to flasks of primary lung fibroblasts after aspirating culture media. Total RNA was purified as per the manufacturer's protocol, with the addition of an extra chloroform extraction step to ensure adequate removal of phenol from samples. RNA quality was assessed using an Agilent Bioanalyzer. All samples were of good quality (RIN 9.6-10). For RNA-seq experiments (performed at the Broad Institute), library preparation was done using the Illumina TruSeq RNA Sample kit with poly-T selection. Sequencing was performed using a HiSeq with 75-bp paired end reads, with 50 million reads/sample coverage (range 45-90 million reads per sample). For miRNA-seq experiments, library preparation was done using the Illumina TruSeq Small RNA Sample Kit. Sequencing to quantify miRNA levels was done using an Illumina miSeq with 51-bp single-end reads. In general, 97% of miRNA sequencing data were at and above Q30, and 94% of reads passed quality filter. Read numbers/sample ranged from 0.55 million to 2.5 million. For miRNA-seq, technical replicates were run for each sample.

### *RNA-seq and miRNA-seq data analysis*

For RNA-seq analysis, reads were mapped to the human genome build GRCh37 using Tophat (version 2.0.8), and transcripts were assembled using Cufflinks (version 2.2.1). Differential gene expression was calculated using CuffDiff. A gene was considered differentially expressed if it exhibited an average FPKM $\geq$ 1 in at least one of the cohorts (expressed) and if the fold change was  $\geq$ 1.5-fold or  $\leq$ -1.5-fold, adjusted p-value <0.05. As an additional filter, fold-change based on log<sub>2</sub> (FPKM+1) Cufflinks values was used to remove any false positive that resulted from extremely high/low FPKM values observed in a very small subset of samples.

For miRNA-seq analysis, Bowtie (version 0.12.5) was used to perform a stepwise alignment of fastq files to Illumina databases. Reads were first aligned to a database of contaminants; reads which didn't align to contaminants were then aligned to mature miRNA. Read counts for technical replicates were averaged and only miRNAs that averaged at least 100 counts per sample were considered for further analysis; this amounted to 163 miRNAs. Each miRNA's counts were divided by the sum of all miRNA counts for a given sample. This number was multiplied by 100,000 and then the log<sub>2</sub> value was taken. The resulting scaled dataset was analyzed to find differentially expressed miRNAs using Bioconductor's limma package. miRNAs were considered differentially expressed if the fold change was  $\geq$ +1.35-fold or  $\leq$ -1.35-fold, p<0.1.

Heatmaps were generated using GENE-E (Broad Institute) from z-scored log<sub>2</sub> (FPKM+1) Cufflinks values (RNA-seq) and from z-scored log<sub>2</sub> LIMMA values (miRNA-seq).

### *Real-time Reverse Transcription-Polymerase Chain Reaction (RT-PCR)*

Reverse transcription of RNA samples was carried out using the High Capacity cDNA Reverse Transcription Kit with RNase inhibitor as per the manufacturer's protocol (Life Technologies #4374966). Reverse transcription for miRNA assays was conducted using TaqMan MicroRNA Reverse Transcription Kit (Life Technologies #4366596) in conjunction with appropriate specific miRNA reverse transcription primers for each miRNA (see Table S1). Real-time quantitative PCR reactions consisting of reverse transcription reaction, 2X TaqMan Gene Expression Master Mix (Life Technologies # 4369016), and 20X TaqMan gene expression assays (see Table S1 for list of TaqMan probes used in this study) were run on a Life Technologies QuantStudio 12K Flex according to the manufacturer's protocol. Data was normalized to GAPDH and relative gene expression was calculated using the  $\Delta\Delta C_t$  method.

### *Gene ontology and signature analysis of differentially expressed gene sets*

Gene ontology (GO) analysis was conducted using DAVID Bioinformatics Database (version 6.7) [2]. In brief, we included enriched GO terms that were associated with  $\geq 5\%$  of the gene set and a minimum of 4 genes,  $p \leq 0.05$ . Redundant GO terms were collapsed using REVIGO and  $-\log_{10}$  p-values were plotted for each differentially expressed gene set [3].

Myofibroblast TGF- $\beta$  (GSE63659) and Hepatic Stellate Cell (HSC) (E-MEXP-2584) signatures were extracted from NextBio curated studies (fold change  $\geq +1.5$ -fold or  $\leq -1.5$ -fold,  $p \leq 0.05$ ) [4]. A pre-ranked gene set enrichment analysis (GSEA) was performed to determine if these signatures were enriched in the IPF vs. control and SSc vs. control differentially expressed gene lists. IPF and SSc differentially expressed genes were ranked based on their fold-change compared to control patients and then compared to the TGF- $\beta$  and HSC signatures using GSEA (classic enrichment statistic) [5]. Genes were categorized as being associated with WNT based on KEGG (hsa04310: Wnt signaling pathway) as well as by including additional upstream and downstream components of the pathway based on literature findings

Ingenuity Pathway Analysis (IPA) was utilized to interrogate pathways that may be activated upstream of IPF and SSc differentially expressed gene sets.

### *miRNA mimic transfection into primary lung fibroblasts*

For miRNA mimic transfection studies, primary lung fibroblasts from 2 patients (SSc-15, IPF-19) were reverse transfected with a miRNA mimic or negative control mimic (2.5 nM final concentration) using Lipofectamine RNAiMAX (Invitrogen). In brief, 500  $\mu$ L of Opti-MEM media, 6.25  $\mu$ L Lipofectamine RNAiMAX, and a mirVana miRNA or control mimic (Life Technologies, see Table S1) were incubated at room temperature for 20 min. Fibroblasts ( $3.0 \times 10^5$  cells/35 mm<sup>2</sup> well) were then added directly to the transfection mixture and allowed to transfect for 48 hr. After 48 hr, Trizol was directly added to each well and RNA was purified using a Trizol/RNeasy hybrid protocol.

### *Nanostring sample preparation and data analysis*

RNA from miRNA mimic transfection studies was subjected to Nanostring gene expression analysis as per the manufacturer's protocol using a custom codeset consisting of common "fibrosis" genes. The 542 genes in this panel were chosen based on their association with fibrotic disease based on literature and publicly available transcriptional profiling datasets, their association with fibrosis-relevant pathways, and over 400 matrixome components. In brief, the hybridization reaction consisting of 10  $\mu$ L Reporter CodeSet, 10  $\mu$ L hybridization buffer, 5  $\mu$ L sample RNA (100 ng total), and 5  $\mu$ L Capture ProbeSet was incubated overnight ( $>12$  hr) at 65° C. Hybridized samples were then run and immobilized in a Sample Cartridge using the nCounter Prep Station set to the high sensitivity setting. Data from processed Sample Cartridges were then acquired using the nCounter Digital Analyzer set to high detail (600 fields of view).

Gene expression data was analyzed using nSolver 2.5. Data was normalized using the geometric mean of positive control probes and to the geometric mean of a panel of 15 housekeeping genes. Genes that were low/not expressed (geometric mean of normalized signal  $\leq 10$ ) were excluded, and genes were considered differentially expressed based on fold-change  $\geq +1.5$ -fold or  $\leq -1.5$ -fold,  $p \leq 0.05$ .

#### *ECM protein extraction for proteomic profiling*

Fibroblasts (n=10 each for IPF, SSc, and control) were cultured for 4-weeks in complete media supplemented with 10  $\mu\text{g}/\text{mL}$  ascorbate every 3 days. After 4 weeks of culture, fibroblasts were harvested and the ECM proteins were enriched by a sequential extraction of cellular and extracellular proteins as detailed by Didangelos et al [6] and Decaris et al [7]. Protease/phosphatase inhibitor cocktails and 25mM EDTA were added to the extraction solutions below. Briefly, the cell monolayer was first washed 4 times with cold 1x PBS. Then, 0.5M NaCl, 10 mM Tris-HCl, pH 7.5 was added to the attached monolayer for 2 hours to extract/remove loosely bound proteins. 0.08% SDS was then added and the entire contents of the plate were scraped into a 15-mL tube whereupon it was slowly vortexed overnight to extract cellular proteins. The whole mixture was centrifuged at 16,000  $\times g$  and the pellets were collected. The pellets, which were enriched for ECM proteins, were further extracted using 4M guanidine HCl, sodium acetate, pH 5.8 for 48 hours with fast vortex. Following centrifugation (16,000  $\times g$ ), the supernatants were collected as the guanidine-soluble ECM fraction. The guanidine-insoluble pellet was rinsed 4 times with water and stored at  $-80^\circ \text{C}$  until further processing. The resulting two ECM-enriched fractions, guanidine-soluble and guanidine-insoluble named "soluble ECM" and "insoluble ECM", were then used for proteomic analysis.

#### *Sample preparation for proteomic analysis*

The extracted soluble and insoluble ECM samples were then subjected to further processing for TMT labeled proteomic analysis. Guanidine-insoluble ECM samples were homogenized in 4M urea and 50 mM triethyl ammonium bicarbonate (TEAB) using a GentleMACS apparatus. For the guanidine-soluble ECM samples, protein was extracted with ethanol at  $-20^\circ \text{C}$  overnight, whereupon the pellet was collected by centrifugation, washed twice with 90% ethanol, air-dried, and resuspended in 8M urea. Protein concentrations were measured using a NanoDrop-1000 spectrophotometer.

20  $\mu\text{g}$  of each sample was reduced by tris(2-carboxyethyl)phosphine (TCEP) at  $55^\circ \text{C}$  for 1 hr. The samples were cooled to room temperature and followed by alkylation using iodoacetamide at room temperature for 30 min. Chilled acetone in a volume ratio of 7/1 (7 parts acetone/1 part sample) was added to each sample, which was then stored at  $-30^\circ \text{C}$  overnight. The samples were centrifuged at 8000  $\times g$ ,  $4^\circ \text{C}$  for 10 minutes and then the samples were inverted to decant the acetone without disturbing the pellet. Pellets were dried for 2-3 minutes and then dissolved in 50 mM triethyl ammonium bicarbonate (TEAB) and 1.6 M urea. The samples were digested with 500 ng trypsin/lys C mix (Promega) at  $37^\circ \text{C}$  for 4 hours and then another 500 ng trypsin/lys C mix at  $37^\circ \text{C}$  overnight. The resulting peptide pools were then labeled using Thermo Fisher's TMT10plex label reagent according to the manufacturer's protocol. The labeled samples were pooled together and then fractionated into three fractions. LC-MS of the fractions were acquired using a Thermo Fisher Scientific QE HF mass spectrometer, which was equipped with an easy nano-spray source and in-line with a Thermo Easy-nLC 1000 UHPLC. The chromatography separation was performed using an EASY-Spray column, 50cm  $\times$  75 $\mu\text{m}$  ID, PepMap RSLC C18, 2 $\mu\text{m}$ . The mass spectrometer was operated in a positive mode with data-dependent top-10 MS/MS scan mode.

Peptide identification and quantification were performed using Maxquant searched against the human Swiss-Prot reference database. MS/MS spectra searches allowed variable modifications of oxidized methionine, N-terminal acetylation and hydroxyproline. Two steps were used to normalize the raw data: 1) an intra-experimental (within plex) variation step – for each sample, each protein's raw

signal was normalized to the median ion intensity of the protein within the plex, and 2) an inter-experimental (across plexes) variation step – for each sample, each protein's normalized value from step 1) was transformed by dividing it by the mean of all normalized values of the protein obtained in step 1). Protein levels among healthy control, IPF and SSc were compared by ANOVA test followed by Tukey's HSD test. Statistical significance was set at less than 0.05.

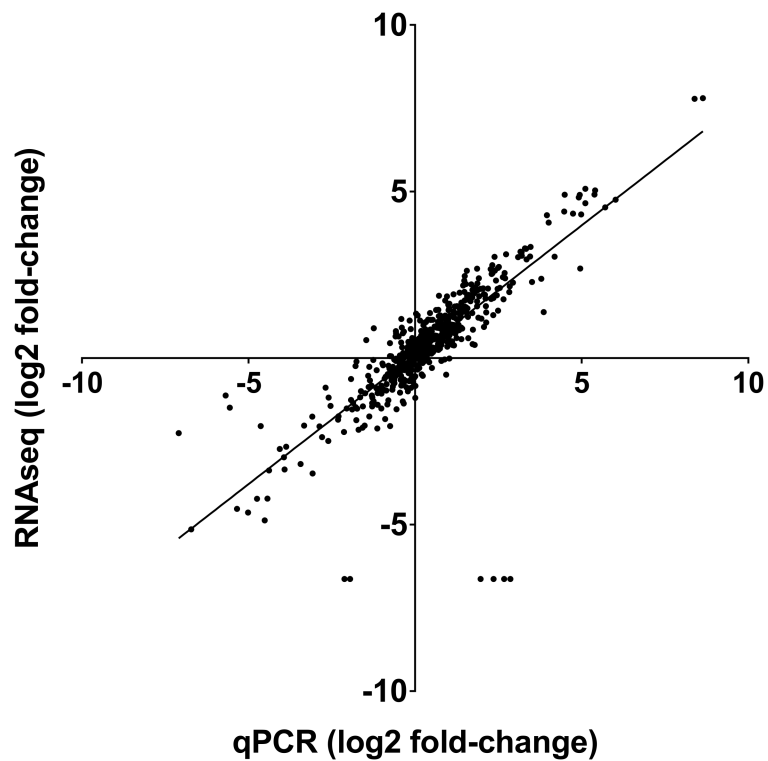

**Figure S1. Gene expression values are highly correlative between RNA-seq and qPCR. Expression values for 18 genes across the 30 fibroblast samples were compared across RNA-seq and qPCR. RNA-seq  $\log_2$  (FPKM+0.01) Cufflinks values were used to generate the  $\log_2$  fold-change for each gene/sample pair relative to the average control value. These were plotted against the  $\Delta\Delta C_t$  values obtained from qPCR. Linear regression analysis found a significant correlation for qPCR vs RNA-seq values (R square= 0.6547,  $p < 0.0001$ ).**

A

Higher expression in SSc

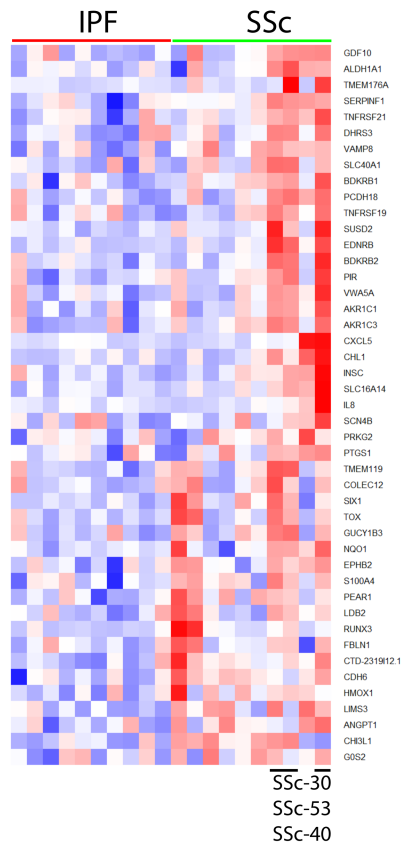

B

Higher expression in IPF

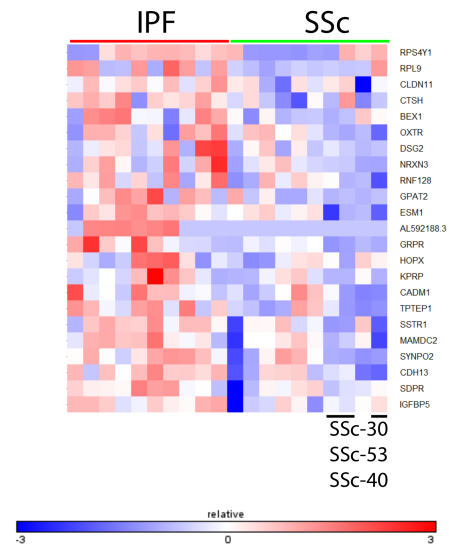

C

Higher expression in SSc

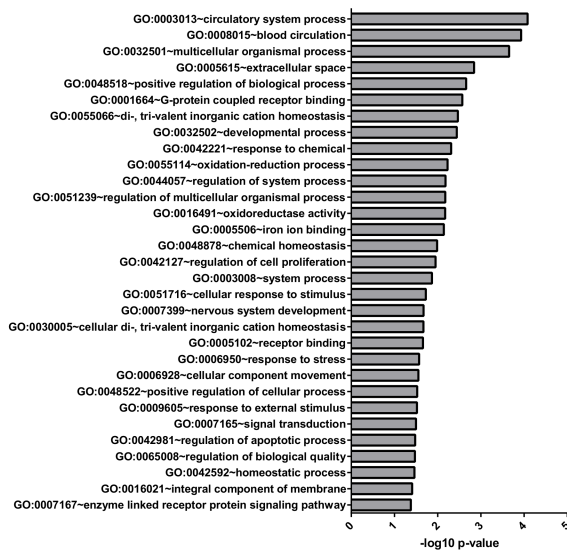

D

Higher expression in IPF

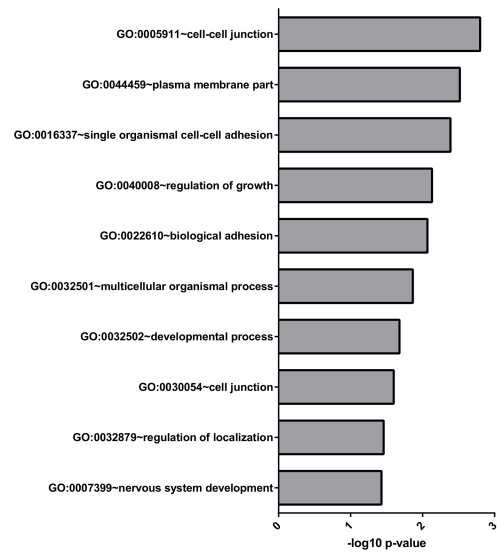

**Figure S2. RNA-seq identifies 68 DEGs between IPF and SSc lung fibroblasts.** Heatmaps of genes more highly expressed in SSc (A) or in IPF (B) fibroblasts as determined from RNA-seq analysis using Cuffdiff (fold-change  $\geq +1.5$ -fold or  $\leq -1.5$ -fold,  $q < 0.05$ ) are shown, with the 3 SSc patients that seem to be driving many of the differences indicated below. Gene ontology analysis of the genes more highly expressed in SSc (C) or in IPF (D) fibroblasts was conducted using DAVID. Shown are the significantly enriched GO terms ( $p \leq 0.05$ ,  $\geq 5\%$  of genes had to be classified by a GO term), with highly similar GO terms being collapsed using REVIGO.

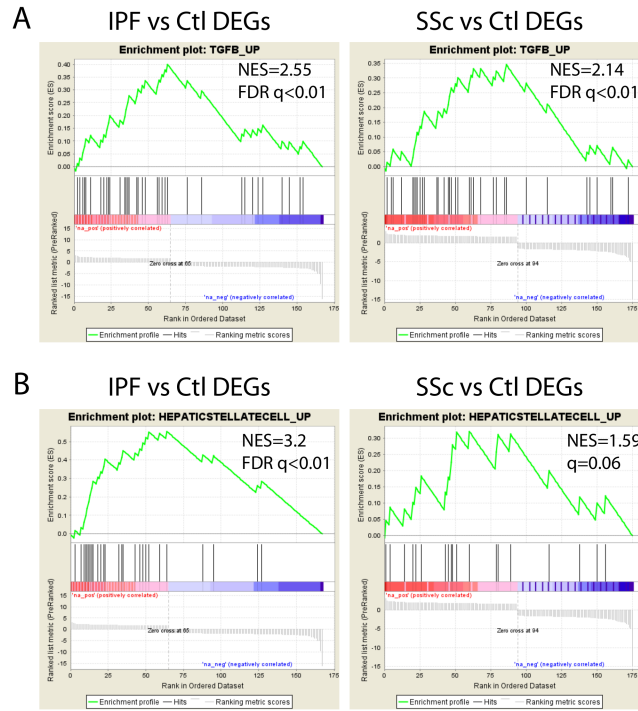

**Figure S3. IPF and SSc fibroblast gene expression profiles reflect activated hepatic stellate cell (HSC) and TGF- $\beta$  gene signatures.** A. The TGF- $\beta$  signature was obtained from NextBio and the upregulated genes were used as a gene set for GSEA analysis on the IPF (left panel) and SSc (right panel) DEGs. B. The activated HSC signature was obtained from NextBio and the upregulated genes were used as a gene set for GSEA analysis on the IPF (left panel) and SSc (right panel) DEGs. Normalized enrichment score (NES) and FDR q values are indicated in the figure.

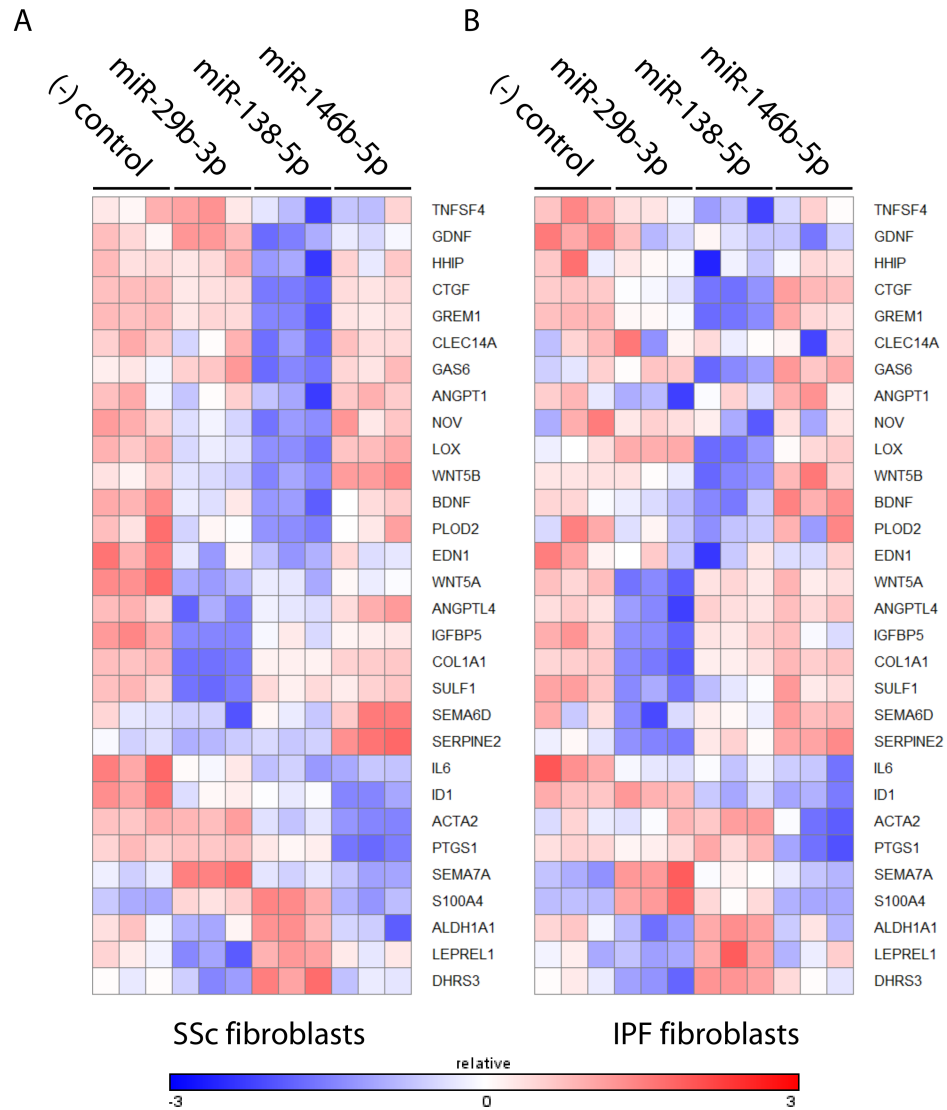

**Figure S4. miR-29b-3p, miR-138-5p, and miR-146b-5p mimics downregulate expression of pro-fibrotic genes that are dysregulated in disease fibroblasts.** miRNA mimics for miR-29b-3p, miR-138-5p, or miR-146b-5p were transfected into primary SSc (A) or IPF (B) lung fibroblasts as described in Materials and Methods for 48 hours prior to collecting RNA. Gene expression was measured using Nanostring analysis. Shown is a heatmap depicting expression of genes upregulated in disease fibroblasts whose expression was significantly affected ( $\geq +1.5$ -fold or  $\leq -1.5$ -fold,  $p \leq 0.05$ ) by at least one of the miRNA mimics in either the SSc or IPF fibroblasts.



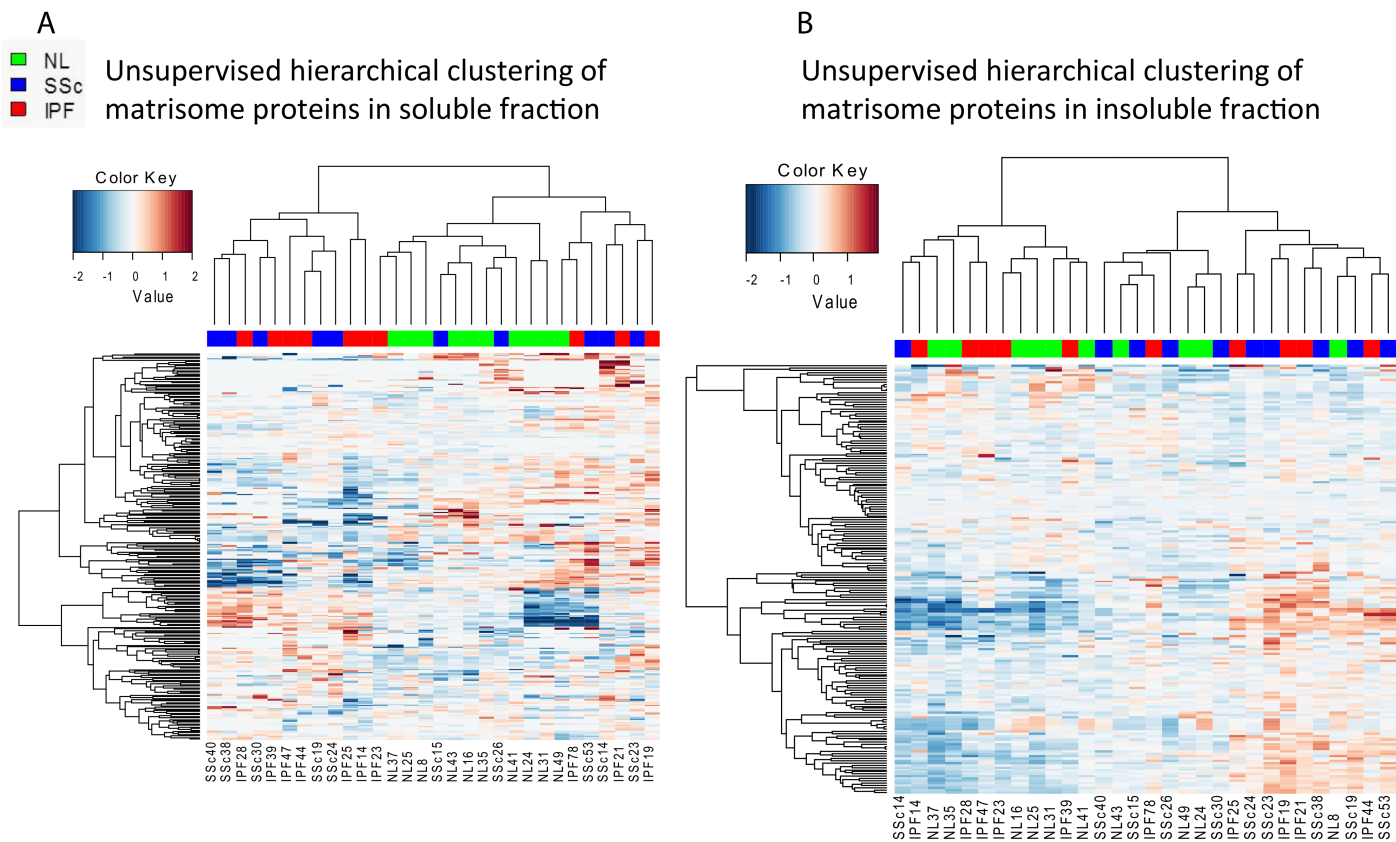

**C**

|               | Increased levels |           | Decreased levels |           |
|---------------|------------------|-----------|------------------|-----------|
|               | Soluble          | Insoluble | Soluble          | Insoluble |
| IPF vs Normal | 11               | 5         | 17               | 1         |
| SSc vs Normal | 12               | 14        | 14               | 4         |
| SSc vs IPF    | 5                | 0         | 3                | 2         |

Fold-change  $\geq$  +/- 1.2-fold,  $p \leq 0.05$

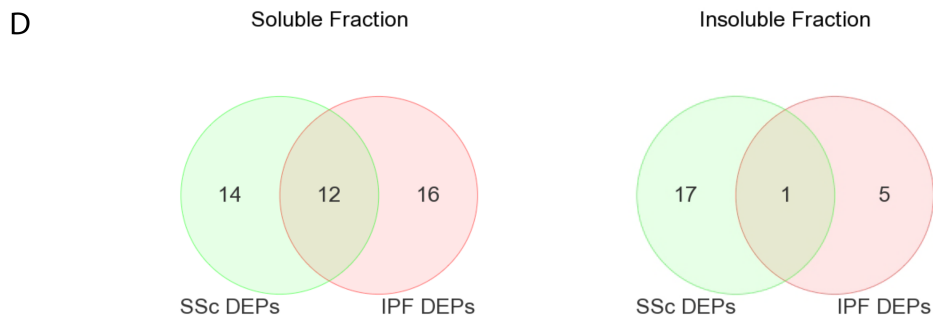

**Figure S5. Proteomic profiling of ECM deposited by IPF and SSc lung fibroblasts reveals a fibrotic matrixome signature that delineates them from normal fibroblasts.** Mass spectrometric analysis was conducted on ECM secreted by IPF, SSc, or normal fibroblasts after long-term culture. Unsupervised hierarchical clustering using detected matrixome proteins shows 2 distinct groups when utilizing data from the soluble fraction (A) but not when using the insoluble fractions (B). C. Overview of the number of differentially expressed proteins (DEP) between all group comparisons for both the soluble and insoluble fractions. D. Venn diagram illustrating the overlapping DEPs between IPF and SSc fibroblasts for both the soluble and insoluble fractions.

**Table S1****List of Taqman probes and miRNA mimics used**

| <b>Taqman probes used for qPCR</b>       |                                 |
|------------------------------------------|---------------------------------|
| Gene symbol                              | Taqman Gene Expression Assay ID |
| ACAN                                     | Hs00153936_m1                   |
| ACTA2                                    | Hs00426835_g1                   |
| CDH6                                     | Hs01026780_m1                   |
| CLEC14A                                  | Hs00545534_s1                   |
| COL8A1                                   | Hs00156669_m1                   |
| ELN                                      | Hs00355783_m1                   |
| FBN2                                     | Hs00266592_m1                   |
| GAPDH                                    | 4326317E                        |
| HAPLN1                                   | Hs00157103_m1                   |
| HEATR6                                   | Hs00375382_m1                   |
| IGFBP5                                   | Hs00181213_m1                   |
| KISS1                                    | Hs00158486_m1                   |
| LOX                                      | Hs00942480_m1                   |
| LOXL2                                    | Hs00158757_m1                   |
| PLOD2                                    | Hs01118190_m1                   |
| PXDN                                     | Hs00395488_m1                   |
| SERPINE2                                 | Hs00385730_m1                   |
| SULF1                                    | Hs00290918_m1                   |
| WNT5A                                    | Hs00998537_m1                   |
| <b>Taqman miRNA assays</b>               |                                 |
| miRNA                                    | miRNA assay ID                  |
| hsa-miR-29b                              | 000413                          |
| hsa-miR-20a                              | 000580                          |
| hsa-miR-155                              | 002623                          |
| <b>miRNA mimics (mirVana)</b>            |                                 |
| miRNA                                    | mirVana miRNA mimic ID          |
| hsa-miR-146b-5p                          | MC10105                         |
| hsa-miR-138-5p                           | MC11727                         |
| hsa-miR-29b-3P                           | MC10103                         |
| mirVana miRNA Mimic, Negative Control #1 | 4464058                         |

**Table S2**  
**Patient information summary**

|                       | Normal<br>n=10 | IPF<br>n=10     | SSc<br>n=10     |
|-----------------------|----------------|-----------------|-----------------|
| Mean age (years)      | 48.8           | 60.9            | 47.2            |
| Gender                |                |                 |                 |
| Male                  | 4              | 8               | 4               |
| Female                | 6              | 2               | 6               |
| Smoking history       |                |                 |                 |
| yes                   | 5              | 6               | 4               |
| no                    | 2              | 4               | 6               |
| n/a                   | 3              | 0               | 0               |
| SSc skin disease      |                |                 |                 |
| Limited               |                |                 | 3               |
| Diffuse               |                |                 | 4               |
| n/a                   |                |                 | 3               |
| Additional parameters |                |                 |                 |
| mean $\pm$ SD         |                |                 |                 |
| FVC %                 | n/a            | 43.1 $\pm$ 8.9  | 31.6 $\pm$ 10.6 |
| DLCO %                | n/a            | 31.3 $\pm$ 13.6 | 23.3 $\pm$ 6.0  |
| PA mean (mmHg)        | n/a            | 25.2 $\pm$ 6.7  | 22.6 $\pm$ 4.9  |

**Table S3**  
**Individual patient information**

| Sample ID | Patient Group | Sex    | Age (years) | FVC % | DLCO % | PA Mean (mmHg) | Smoking | Skin Disease Type |
|-----------|---------------|--------|-------------|-------|--------|----------------|---------|-------------------|
| NL-16     | Control       | Female | 49          |       |        |                | +smoke  |                   |
| NL-24     | Control       | Female | 44          |       |        |                | +smoke  |                   |
| NL-25     | Control       | Female | 39          |       |        |                | +smoke  |                   |
| NL-31     | Control       | Female | 75          |       |        |                | -smoke  |                   |
| NL-41     | Control       | Female | 53          |       |        |                | +smoke  |                   |
| NL-49     | Control       | Female | 24          |       |        |                | -smoke  |                   |
| NL-35     | Control       | Male   | 56          |       |        |                | n/a     |                   |
| NL-37     | Control       | Male   | 50          |       |        |                | n/a     |                   |
| NL-43     | Control       | Male   | 44          |       |        |                | +smoke  |                   |
| NL-8      | Control       | Male   | 54          |       |        |                | n/a     |                   |
| IPF-21    | IPF           | Female | 53.8        | 39    | 17     | 35             | -smoke  |                   |
| IPF-39    | IPF           | Female | 53.7        | 40    | 19     | 19             | -smoke  |                   |
| IPF-14    | IPF           | Male   | 46.3        | 33    | 29     | 34             | +smoke  |                   |
| IPF-19    | IPF           | Male   | 58.4        | 55    | 30     | 19             | -smoke  |                   |
| IPF-23    | IPF           | Male   | 63.9        | 41    | 61     | 23             | +smoke  |                   |
| IPF-25    | IPF           | Male   | 66.6        | 58    | 35     | 28             | +smoke  |                   |
| IPF-28    | IPF           | Male   | 59.8        | 46    | 42     | 16             | -smoke  |                   |
| IPF-44    | IPF           | Male   | 63.8        | 50    | 22     | 29             | +smoke  |                   |
| IPF-47    | IPF           | Male   | 68          | 36    | -      | 20             | +smoke  |                   |
| IPF-78    | IPF           | Male   | 75.1        | 33    | 27     | 29             | +smoke  |                   |
| SSc-14    | SSc           | Female | 34.6        | 28    | 32     | -              | -smoke  | Diffuse           |
| SSc-15    | SSc           | Female | 47.7        | 18    | -      | 14             | +smoke  | Diffuse           |
| SSc-19    | SSc           | Female | 37          | 18    | -      | 26             | -smoke  | Diffuse           |
| SSc-23    | SSc           | Female | 51.7        | 36    | 20     | 22             | +smoke  | Limited           |
| SSc-30    | SSc           | Female | 58.8        | 39    | 14     | 19             | -smoke  | n/a               |
| SSc-38    | SSc           | Female | 49          | 26    | 19     | 21             | +smoke  | Limited           |
| SSc-24    | SSc           | Male   | 45.1        | 26    | 30     | 23             | -smoke  | n/a               |
| SSc-26    | SSc           | Male   | 57.5        | 33    | 26     | 24             | -smoke  | Diffuse           |
| SSc-40    | SSc           | Male   | 44.3        | 40    | 24     | 32             | -smoke  | Limited           |
| SSc-53    | SSc           | Male   | 46.4        | 52    | 21     | 22             | +smoke  | n/a               |

Table S4

RNAseq expression data for DEGs across all cohort comparisons (IPF vs Normal, SSc vs Normal, SSc vs IPF)

## IPF vs Normal DEGs

| gene                                  | locus                 | SSc vs Normal     |            | IPF vs Normal     |            | SSc vs IPF        |            |
|---------------------------------------|-----------------------|-------------------|------------|-------------------|------------|-------------------|------------|
|                                       |                       | log2(fold_change) | q_value    | log2(fold_change) | q_value    | log2(fold_change) | q_value    |
| LCE3A                                 | 1:152595083-152596370 | 0.260375          | 0.999971   | 3.39435           | 0.00302503 | -3.13397          | 0.00588648 |
| KISS1                                 | 1:204159468-204165614 | 1.76444           | 0.0276966  | 2.93945           | 0.00302503 | -1.17501          | 0.0544352  |
| CLEC14A                               | 14:38720656-38747180  | 2.66734           | 0.00302503 | 2.81147           | 0.00302503 | -0.144133         | 0.999971   |
| ADRA1D                                | 20:4201236-4230191    | 1.45214           | 0.0112285  | 2.2127            | 0.00302503 | -0.760564         | 0.382056   |
| AL589743.1,RP11-146E13.2,RP11-496I2.4 | 14:19650017-19925346  | 2.29558           | 0.00723681 | 2.17153           | 0.0137916  | 0.124054          | 0.999971   |
| CCND2                                 | 12:4357930-4414516    | 1.49718           | 0.00302503 | 2.01021           | 0.00302503 | -0.513032         | 0.568482   |
| GPAT2                                 | 2:96676307-96705199   | -0.176993         | 0.999971   | 1.89291           | 0.0137916  | -2.0699           | 0.0150479  |
| CORIN                                 | 4:47595959-47840385   | 1.063             | 0.034065   | 1.88389           | 0.00302503 | -0.820891         | 0.0276966  |
| SERPINE2                              | 2:224839828-224904036 | 2.13461           | 0.00302503 | 1.87439           | 0.00302503 | 0.260226          | 0.999971   |
| AP000525.8                            | 22:16147975-16193072  | 1.82934           | 0.00302503 | 1.82142           | 0.00302503 | 0.0079158         | 0.999971   |
| BEX1                                  | X:102317578-102319168 | 0.317879          | 0.999971   | 1.70896           | 0.00723681 | -1.39108          | 0.00856372 |
| FMO3                                  | 1:171060010-171087008 | 1.7533            | 0.00302503 | 1.64992           | 0.00302503 | 0.103374          | 0.999971   |
| PLCB4                                 | 20:9049351-9461889    | 1.50913           | 0.00302503 | 1.64647           | 0.00302503 | -0.13734          | 0.999971   |
| WFDC1                                 | 16:84328229-84363457  | 1.51177           | 0.00302503 | 1.42874           | 0.00302503 | 0.0830339         | 0.999971   |
| EDN1                                  | 6:12290328-12297427   | 0.966784          | 0.0700105  | 1.39791           | 0.00302503 | -0.431125         | 0.938352   |
| ANGPTL4                               | 19:8428172-8469318    | 1.16155           | 0.329233   | 1.34145           | 0.00989026 | -0.179906         | 0.999971   |
| LOX                                   | 5:121297655-121414246 | 0.870875          | 0.00302503 | 1.31352           | 0.00302503 | -0.442642         | 0.642502   |
| WNT5A                                 | 3:55499740-55523973   | 1.17421           | 0.00302503 | 1.24029           | 0.00302503 | -0.0660868        | 0.999971   |
| AMIGO2                                | 12:47469489-47630443  | 1.82472           | 0.00302503 | 1.2227            | 0.00302503 | 0.602022          | 0.2818     |
| BDNF                                  | 11:27528384-27899195  | 1.02968           | 0.142      | 1.20237           | 0.0276966  | -0.172689         | 0.999971   |
| TNFSF4                                | 1:173152803-173446318 | 0.520467          | 0.946835   | 1.18406           | 0.0150479  | -0.663596         | 0.524989   |
| MEST                                  | 7:130126045-130148506 | 1.04211           | 0.198317   | 1.16044           | 0.00723681 | -0.118337         | 0.999971   |
| PCDH10                                | 4:134070461-134129589 | 0.831622          | 0.0575555  | 1.15171           | 0.00302503 | -0.320086         | 0.999971   |
| PSG1,PSG7,PSG8                        | 19:43256837-43441330  | 1.4418            | 0.00302503 | 1.14606           | 0.0150479  | 0.295732          | 0.999971   |
| SSTR1                                 | 14:38675857-38682272  | 0.0621314         | 0.999971   | 1.14106           | 0.00302503 | -1.07893          | 0.00302503 |
| LIMS2                                 | 2:128395955-128439360 | 0.952511          | 0.0124936  | 1.13451           | 0.00302503 | -0.182004         | 0.999971   |
| GDNF                                  | 5:37812778-37876051   | 0.983379          | 0.0436908  | 1.13282           | 0.0330131  | -0.149444         | 0.999971   |
| SULF1                                 | 8:70378858-70573150   | 1.49896           | 0.00302503 | 1.08998           | 0.00388754 | 0.408984          | 0.896417   |
| CPNE7                                 | 16:89642175-89663654  | 1.04916           | 0.00302503 | 1.08782           | 0.00302503 | -0.0386525        | 0.999971   |
| GPR37                                 | 7:124384367-124406040 | 1.30867           | 0.00302503 | 1.06721           | 0.00989026 | 0.241457          | 0.999971   |
| IGFBP5                                | 2:217536827-217858722 | 0.236752          | 0.999971   | 1.05428           | 0.00302503 | -0.81753          | 0.00302503 |
| COL8A1                                | 3:99357298-99518070   | 1.04466           | 0.00302503 | 1.04585           | 0.00302503 | -0.00119162       | 0.999971   |
| SLC8A1                                | 2:40013592-40838193   | 0.587092          | 0.159931   | 1.04428           | 0.00302503 | -0.457193         | 0.402752   |

|                  |                        |           |            |           |            |            |          |
|------------------|------------------------|-----------|------------|-----------|------------|------------|----------|
| KCNS3            | 2:18059113-18542882    | 0.493573  | 0.718216   | 1.02885   | 0.00588648 | -0.53528   | 0.478713 |
| NRG1             | 8:31496901-32627722    | 0.549885  | 0.672092   | 1.0256    | 0.0162705  | -0.475712  | 0.764781 |
| SERINC2          | 1:31882411-31907525    | 0.663769  | 0.00302503 | 1.02403   | 0.00302503 | -0.360261  | 0.347042 |
| NOV              | 8:120428545-120474590  | 0.608123  | 0.0436908  | 0.990075  | 0.00302503 | -0.381952  | 0.576396 |
| GREM1            | 15:33009470-33026870   | 0.666699  | 0.132873   | 0.970882  | 0.00302503 | -0.304183  | 0.999971 |
| PLOD2            | 3:145777312-145881440  | 1.08195   | 0.00302503 | 0.966321  | 0.00302503 | 0.115627   | 0.999971 |
| CPA4             | 7:129932973-129964020  | 0.669192  | 0.0750133  | 0.965885  | 0.00302503 | -0.296693  | 0.997181 |
| TMEM47           | X:34645180-34675405    | 0.690343  | 0.00302503 | 0.947849  | 0.00302503 | -0.257506  | 0.758721 |
| MGAT5            | 2:134877512-135212305  | 0.66778   | 0.00469276 | 0.942995  | 0.00302503 | -0.275215  | 0.846248 |
| FAM70B           | 13:114462168-114517784 | 0.906349  | 0.059618   | 0.936463  | 0.0362438  | -0.030114  | 0.999971 |
| NEDD9            | 6:11173684-11382581    | 0.895117  | 0.00302503 | 0.936184  | 0.00302503 | -0.0410672 | 0.999971 |
| ACTA2            | 10:90639490-90775542   | 0.243406  | 0.999971   | 0.910766  | 0.025545   | -0.667361  | 0.161756 |
| C5orf30          | 5:102594402-102614361  | 0.91983   | 0.00302503 | 0.907649  | 0.00302503 | 0.0121806  | 0.999971 |
| RAB3B            | 1:52373624-52456436    | 0.569176  | 0.0426246  | 0.891563  | 0.00302503 | -0.322387  | 0.733166 |
| SLC16A3          | 17:80186292-80231607   | 0.83945   | 0.00302503 | 0.861532  | 0.00302503 | -0.0220827 | 0.999971 |
| CPE              | 4:166282345-166419472  | 0.704178  | 0.0870136  | 0.849301  | 0.0187202  | -0.145123  | 0.999971 |
| GPR1             | 2:207040000-207082771  | 0.363936  | 0.895446   | 0.830978  | 0.00856372 | -0.467041  | 0.43011  |
| WNT5B            | 12:1639056-1760860     | 0.558916  | 0.025545   | 0.8096    | 0.00302503 | -0.250684  | 0.882927 |
| SEMA7A           | 15:74701629-74726808   | 0.65627   | 0.0124936  | 0.808092  | 0.00388754 | -0.151822  | 0.999971 |
| FAM101B          | 17:289768-295730       | 0.851016  | 0.00302503 | 0.802211  | 0.00302503 | 0.0488044  | 0.999971 |
| DUSP10           | 1:221874765-221915518  | 0.68783   | 0.00469276 | 0.797301  | 0.00302503 | -0.109471  | 0.999971 |
| CHN1             | 2:175664090-175870106  | 0.837281  | 0.00302503 | 0.79232   | 0.00302503 | 0.0449605  | 0.999971 |
| HIST1H2AC        | 6:26124329-26139338    | 0.878435  | 0.00302503 | 0.763555  | 0.00388754 | 0.11488    | 0.999971 |
| ATP8B1           | 18:55297533-55470669   | 0.521838  | 0.0221778  | 0.750932  | 0.00302503 | -0.229095  | 0.924027 |
| AC092535.1,SPON2 | 4:1155624-1202750      | 0.76429   | 0.00302503 | 0.732879  | 0.00302503 | 0.0314109  | 0.999971 |
| SRGN             | 10:70847861-70864567   | 1.06947   | 0.00302503 | 0.710457  | 0.00302503 | 0.359012   | 0.304714 |
| CTGF             | 6:132269093-132398533  | 0.780186  | 0.00302503 | 0.708514  | 0.00302503 | 0.0716713  | 0.999971 |
| SLC2A1           | 1:43391518-43449029    | 0.847984  | 0.00302503 | 0.699794  | 0.00302503 | 0.14819    | 0.999971 |
| FAM180A,SLC13A4  | 7:135347237-135433892  | 0.527076  | 0.30166    | 0.675361  | 0.034065   | -0.148284  | 0.999971 |
| SYNGR2           | 17:76164638-76169608   | 0.559847  | 0.13198    | 0.647745  | 0.0266209  | -0.0878978 | 0.999971 |
| GAS6             | 13:114518602-114570155 | 0.461723  | 0.126443   | 0.644653  | 0.00469276 | -0.18293   | 0.999971 |
| CLGN             | 4:141309520-141349122  | -0.556058 | 0.0730224  | -0.59764  | 0.0319506  | 0.0415824  | 0.999971 |
| MDGA1            | 6:37598454-37667082    | -0.735376 | 0.00388754 | -0.627497 | 0.0124936  | -0.107878  | 0.999971 |
| GALNT6           | 12:51745680-51902980   | -0.704886 | 0.00302503 | -0.632552 | 0.00723681 | -0.0723339 | 0.999971 |
| GFPT2            | 5:179727676-179780387  | -0.29853  | 0.896417   | -0.642884 | 0.0276966  | 0.344354   | 0.801914 |
| EFEMP1           | 2:56093101-56151274    | -0.743544 | 0.00302503 | -0.64853  | 0.00302503 | -0.095014  | 0.999971 |
| F2RL1            | 5:76114680-76131214    | -0.996228 | 0.00302503 | -0.675349 | 0.025545   | -0.320878  | 0.961697 |
| SLIT2            | 4:20253351-20623803    | -0.741785 | 0.00723681 | -0.6899   | 0.0150479  | -0.0518853 | 0.999971 |
| CPD              | 17:28705915-28797007   | -0.513292 | 0.0175003  | -0.692151 | 0.00302503 | 0.178859   | 0.999971 |

|               |                        |           |            |           |            |             |            |
|---------------|------------------------|-----------|------------|-----------|------------|-------------|------------|
| SFRP1         | 8:41119480-41167016    | -0.795026 | 0.00302503 | -0.694752 | 0.00723681 | -0.100273   | 0.999971   |
| PEAR1         | 1:156863148-156886226  | 0.532751  | 0.144725   | -0.697383 | 0.0319506  | 1.23013     | 0.00302503 |
| TNFRSF21      | 6:47199267-47277735    | 0.228251  | 0.999971   | -0.70709  | 0.0298268  | 0.935342    | 0.00302503 |
| LAMB3         | 1:209788219-209825811  | -0.356518 | 0.753179   | -0.729435 | 0.0175003  | 0.372917    | 0.786035   |
| PAPPA         | 9:118916050-119164601  | -0.632865 | 0.0586144  | -0.738314 | 0.00989026 | 0.105449    | 0.999971   |
| OSBPL8        | 12:76745310-76953589   | -0.913699 | 0.00856372 | -0.748986 | 0.0276966  | -0.164713   | 0.999971   |
| PRDM6         | 5:122421426-122530273  | -0.328545 | 0.896417   | -0.754989 | 0.0112285  | 0.426444    | 0.646468   |
| EVL           | 14:100437756-100610653 | -0.412054 | 0.485862   | -0.757724 | 0.00856372 | 0.34567     | 0.780569   |
| CXCL12        | 10:44793037-44881941   | -0.238629 | 0.999971   | -0.770174 | 0.00302503 | 0.531545    | 0.0831223  |
| LRP5          | 11:68080076-68216743   | -0.329383 | 0.661305   | -0.771227 | 0.00302503 | 0.441844    | 0.267251   |
| THSD4         | 15:71389290-72075722   | -1.02987  | 0.00302503 | -0.779248 | 0.00302503 | -0.250621   | 0.999971   |
| MIPEP         | 13:24304327-24476794   | -0.298163 | 0.871243   | -0.801992 | 0.00302503 | 0.503829    | 0.166874   |
| CDCA7         | 2:174202946-174233725  | -0.841555 | 0.0298268  | -0.820206 | 0.0298268  | -0.0213485  | 0.999971   |
| TMEM119       | 12:108983621-108992096 | 0.50707   | 0.0890229  | -0.824454 | 0.00302503 | 1.33152     | 0.00302503 |
| IL1R1         | 2:102681003-102798568  | -0.274836 | 0.828096   | -0.824874 | 0.00302503 | 0.550038    | 0.0394198  |
| PLEKHH2       | 2:43864398-43995204    | -0.420501 | 0.600555   | -0.828918 | 0.00989026 | 0.408417    | 0.733914   |
| GUCY1B3       | 4:156680032-156728746  | 0.0368626 | 0.999971   | -0.831847 | 0.0426246  | 0.86871     | 0.0372946  |
| CSRP2         | 12:77252002-77274132   | -0.89494  | 0.00302503 | -0.835992 | 0.00302503 | -0.0589481  | 0.999971   |
| GPC6          | 13:93878879-95060937   | -0.298366 | 0.629441   | -0.844849 | 0.00302503 | 0.546483    | 0.0351647  |
| TNC           | 9:117782805-117880765  | -1.21006  | 0.00302503 | -0.861244 | 0.00388754 | -0.348821   | 0.844404   |
| MAOB          | X:43625772-43741693    | -1.13845  | 0.00302503 | -0.87574  | 0.00469276 | -0.262706   | 0.999971   |
| PDE1A         | 2:183004595-183387919  | -0.56736  | 0.0955995  | -0.894845 | 0.00302503 | 0.327485    | 0.910801   |
| MDK           | 11:46402305-46405375   | -0.470103 | 0.140139   | -0.902118 | 0.00302503 | 0.432015    | 0.34256    |
| DCHS1         | 11:6642555-6677573     | -1.13556  | 0.00302503 | -0.905467 | 0.00302503 | -0.23009    | 0.999971   |
| MAMSTR,RASIP1 | 19:49210641-49243978   | -0.127834 | 0.999971   | -0.935168 | 0.0266209  | 0.807334    | 0.0870136  |
| PRKG2         | 4:82007662-82137627    | 0.0254716 | 0.999971   | -0.940984 | 0.00302503 | 0.966456    | 0.0162705  |
| NFIB          | 9:14081841-14398982    | -0.949975 | 0.00302503 | -0.947899 | 0.00302503 | -0.00207633 | 0.999971   |
| FAM213A       | 10:82167584-82195320   | -1.47801  | 0.00302503 | -0.959602 | 0.030883   | -0.518405   | 0.852231   |
| SBSN          | 19:36014268-36019317   | -0.44975  | 0.955748   | -0.979699 | 0.0351647  | 0.529949    | 0.871243   |
| S100A2        | 1:153533583-153540366  | -0.98818  | 0.0533991  | -0.989821 | 0.0416127  | 0.00164172  | 0.999971   |
| ENPP2         | 8:120569323-120685693  | -0.793009 | 0.00302503 | -0.992212 | 0.00302503 | 0.199204    | 0.999971   |
| PBX1          | 1:164524820-164868533  | -0.837945 | 0.00469276 | -0.999217 | 0.00302503 | 0.161272    | 0.999971   |
| GAL           | 11:68451246-68458645   | -1.30872  | 0.116091   | -1.01237  | 0.0426246  | -0.296346   | 0.999971   |
| RAMP1         | 2:238767535-238820756  | -0.376645 | 0.896417   | -1.01625  | 0.00302503 | 0.639607    | 0.282389   |
| ADAMTS15      | 11:130317906-130346541 | -1.07791  | 0.00302503 | -1.06821  | 0.00302503 | -0.00969856 | 0.999971   |
| LAMP5         | 20:9485826-9511171     | -2.54364  | 0.00302503 | -1.09282  | 0.00302503 | -1.45083    | 0.00302503 |
| MAFB          | 20:39314487-39317880   | -1.41324  | 0.00302503 | -1.09403  | 0.00469276 | -0.319213   | 0.999971   |
| PRSS35        | 6:84222193-84235423    | -0.131344 | 0.999971   | -1.12779  | 0.00302503 | 0.996447    | 0.00469276 |
| LIMCH1        | 4:41361623-41702061    | -0.560045 | 0.789438   | -1.1385   | 0.0150479  | 0.578454    | 0.77343    |

|                             |                        |           |            |          |            |            |            |
|-----------------------------|------------------------|-----------|------------|----------|------------|------------|------------|
| TNFRSF19                    | 13:24144506-24250232   | -0.357083 | 0.509991   | -1.14053 | 0.00302503 | 0.783445   | 0.00469276 |
| NHSL2                       | X:71130737-71381600    | -1.38574  | 0.00302503 | -1.14171 | 0.0416127  | -0.244035  | 0.999971   |
| MAN1C1                      | 1:25943306-26112698    | -1.19178  | 0.00302503 | -1.15725 | 0.00302503 | -0.0345257 | 0.999971   |
| FGFR4                       | 5:176513869-176525345  | -0.355308 | 0.999971   | -1.17055 | 0.0298268  | 0.815244   | 0.510668   |
| TBX4                        | 17:59529764-59562471   | -1.47219  | 0.00302503 | -1.17466 | 0.00302503 | -0.297539  | 0.999971   |
| MMP1                        | 11:102617698-102714534 | -1.86491  | 0.00302503 | -1.18197 | 0.00723681 | -0.682941  | 0.743673   |
| LCNL1,PTGDS                 | 9:139871955-139880862  | -0.975761 | 0.00302503 | -1.19521 | 0.00302503 | 0.21945    | 0.999971   |
| COLEC12                     | 18:319360-500722       | -0.134184 | 0.999971   | -1.21622 | 0.00302503 | 1.08204    | 0.00302503 |
| ATF3                        | 1:212738675-212794119  | -0.114919 | 0.999971   | -1.22725 | 0.0137916  | 1.11233    | 0.030883   |
| A2M                         | 12:9217772-9268825     | -0.871959 | 0.0575555  | -1.22874 | 0.00302503 | 0.356784   | 0.999971   |
| SLC7A8                      | 14:23594501-23652909   | -0.588287 | 0.19346    | -1.22971 | 0.00302503 | 0.641419   | 0.227773   |
| NDNF                        | 4:121952327-122001631  | -1.01702  | 0.00302503 | -1.24948 | 0.00302503 | 0.23246    | 0.999971   |
| SCN4B                       | 11:118004091-118023762 | -0.478087 | 0.418586   | -1.27878 | 0.00302503 | 0.800695   | 0.0266209  |
| CFI                         | 4:110661851-110723335  | -0.317198 | 0.999971   | -1.28279 | 0.00856372 | 0.965597   | 0.063705   |
| ADORA1                      | 1:203059781-203136614  | -1.26392  | 0.00302503 | -1.2921  | 0.00302503 | 0.0281808  | 0.999971   |
| GOS2                        | 1:209834708-209915895  | -0.157915 | 0.999971   | -1.319   | 0.00989026 | 1.16108    | 0.0244098  |
| CELSR1                      | 22:46755428-46933362   | -0.873509 | 0.140139   | -1.35387 | 0.0187202  | 0.480357   | 0.999971   |
| SIX1                        | 14:61110131-61125672   | -0.293105 | 0.999971   | -1.36049 | 0.00302503 | 1.06738    | 0.0150479  |
| PALM                        | 19:708952-748329       | -1.59906  | 0.00302503 | -1.36195 | 0.00302503 | -0.237106  | 0.999971   |
| MAP2                        | 2:210288729-210599089  | -0.926916 | 0.00856372 | -1.37237 | 0.00302503 | 0.44545    | 0.593664   |
| HIF3A                       | 19:46800302-46846690   | -1.2087   | 0.062654   | -1.39047 | 0.030883   | 0.181768   | 0.999971   |
| AC109642.1                  | 2:30569354-30584134    | -1.12109  | 0.00723681 | -1.44813 | 0.00302503 | 0.327042   | 0.999971   |
| APOC1                       | 19:45417503-45422606   | -0.83411  | 0.616315   | -1.48615 | 0.00989026 | 0.652041   | 0.956226   |
| DMKN                        | 19:35988059-36004645   | -0.754861 | 0.214483   | -1.50103 | 0.00302503 | 0.74617    | 0.256087   |
| XIST                        | X:73040285-73072588    | -0.242374 | 0.999971   | -1.52529 | 0.0405115  | 1.28291    | 0.112337   |
| CD36                        | 7:79959507-80308593    | -1.20063  | 0.0658323  | -1.52678 | 0.00302503 | 0.326154   | 0.999971   |
| SEMA3F                      | 3:49977439-50226508    | -1.50488  | 0.0124936  | -1.52978 | 0.0383156  | 0.0249019  | 0.999971   |
| LRRN3                       | 7:110302716-111202573  | -0.340531 | 0.999971   | -1.53352 | 0.00302503 | 1.19299    | 0.0512128  |
| SEPP1                       | 5:42756902-42887494    | -0.74341  | 0.0210273  | -1.5444  | 0.00302503 | 0.800991   | 0.00588648 |
| CDON                        | 11:125820010-125933230 | -1.38809  | 0.00302503 | -1.546   | 0.00302503 | 0.157909   | 0.999971   |
| IGJ                         | 4:71494460-71552533    | -0.983826 | 0.0276966  | -1.54752 | 0.00302503 | 0.563694   | 0.676214   |
| UNC5C                       | 4:96083654-96470414    | -1.21554  | 0.00989026 | -1.5544  | 0.00388754 | 0.33886    | 0.999971   |
| DES                         | 2:220283098-220291461  | -1.90839  | 0.00302503 | -1.56993 | 0.00302503 | -0.338461  | 0.999971   |
| VAMP8                       | 2:85788684-85809154    | -0.315816 | 0.999971   | -1.59497 | 0.00302503 | 1.27916    | 0.0124936  |
| TMEM37                      | 2:120187476-120196121  | -0.952097 | 0.38817    | -1.62608 | 0.00588648 | 0.673981   | 0.921377   |
| TAGLN3                      | 3:111717510-111732734  | -1.14138  | 0.116091   | -1.68875 | 0.00302503 | 0.547373   | 0.999971   |
| P2RY1                       | 3:152552586-152559228  | -0.898803 | 0.0150479  | -1.70779 | 0.00302503 | 0.808986   | 0.166874   |
| RARRES2                     | 7:150035407-150038763  | -0.884366 | 0.00388754 | -1.71935 | 0.00302503 | 0.834982   | 0.0162705  |
| C19orf33,CTB-102L5.4,SPINT2 | 19:38734674-38795649   | -0.788092 | 0.898677   | -1.75194 | 0.00469276 | 0.963846   | 0.751744   |



|         |                       |           |            |          |            |           |            |
|---------|-----------------------|-----------|------------|----------|------------|-----------|------------|
| ZNF467  | 7:149461270-149470731 | -1.15485  | 0.50626    | -1.81364 | 0.00302503 | 0.658791  | 0.999971   |
| SLC40A1 | 2:190425304-190448484 | -0.99809  | 0.00302503 | -1.87681 | 0.00302503 | 0.878721  | 0.00723681 |
| PITX2   | 4:111538578-111563279 | -1.69515  | 0.00302503 | -1.87806 | 0.00388754 | 0.182918  | 0.999971   |
| MCOLN2  | 1:85391132-85462834   | -0.891509 | 0.184085   | -1.89015 | 0.00302503 | 0.998643  | 0.239183   |
| IGSF10  | 3:150803483-151179030 | -2.19864  | 0.00302503 | -2.04226 | 0.00302503 | -0.156378 | 0.999971   |
| COL14A1 | 8:121072018-121385732 | -1.76617  | 0.00302503 | -2.09567 | 0.00302503 | 0.329496  | 0.999971   |
| C8orf4  | 8:40010988-40012821   | -2.25663  | 0.00302503 | -2.11322 | 0.00302503 | -0.143415 | 0.999971   |
| TRIM55  | 8:67039130-67088001   | -2.60438  | 0.00302503 | -2.16867 | 0.00302503 | -0.435707 | 0.999971   |
| SIPA1L2 | 1:232533558-232744697 | -1.37043  | 0.00723681 | -2.32741 | 0.00302503 | 0.956975  | 0.131086   |
| GPRC5C  | 17:72420989-72447792  | -1.61414  | 0.034065   | -2.41437 | 0.00302503 | 0.800232  | 0.896417   |
| GAP43   | 3:115342170-115440337 | -3.33626  | 0.00302503 | -2.87335 | 0.00302503 | -0.462914 | 0.999971   |
| MYBPH   | 1:203136937-203144944 | -1.55666  | 0.132873   | -3.34395 | 0.00302503 | 1.78729   | 0.190014   |
| GDF10   | 10:48425784-48439152  | -2.02977  | 0.00302503 | -3.44738 | 0.00302503 | 1.4176    | 0.0491193  |
| CHI3L1  | 1:203148023-203155877 | -1.03411  | 0.00302503 | -3.56539 | 0.00302503 | 2.53128   | 0.00302503 |
| MYH11   | 16:15737123-15950890  | -3.93173  | 0.00388754 | -4.23497 | 0.00302503 | 0.303238  | 0.999971   |
| IGFN1   | 1:201159896-201198080 | -2.86057  | 0.00302503 | -4.9559  | 0.00302503 | 2.09534   | 0.00302503 |

#### SSc vs Normal DEGs

| gene                                  | locus                 | SSc vs Normal     |            | IPF vs Normal     |            | SSc vs IPF        |            |
|---------------------------------------|-----------------------|-------------------|------------|-------------------|------------|-------------------|------------|
|                                       |                       | log2(fold_change) | q_value    | log2(fold_change) | q_value    | log2(fold_change) | q_value    |
| HAPLN1                                | 5:82933609-83017432   | 4.90569           | 0.00302503 | 1.52308           | 0.468647   | 3.38261           | 0.00302503 |
| CXCR7                                 | 2:237476388-237491001 | 3.40808           | 0.00302503 | 1.13404           | 0.574218   | 2.27404           | 0.00302503 |
| HHIP                                  | 4:145564073-145666423 | 3.27756           | 0.00302503 | 1.42024           | 0.099241   | 1.85733           | 0.0137916  |
| TOX                                   | 8:59715079-60033905   | 2.99944           | 0.00302503 | 0.67698           | 0.999971   | 2.32246           | 0.00302503 |
| RUNX3                                 | 1:25226001-25291612   | 2.79463           | 0.00302503 | 0.118147          | 0.999971   | 2.67648           | 0.00302503 |
| WISP1                                 | 8:134203179-134243896 | 2.72409           | 0.00302503 | 1.24843           | 0.0436908  | 1.47566           | 0.00302503 |
| CLEC14A                               | 14:38720656-38747180  | 2.66734           | 0.00302503 | 2.81147           | 0.00302503 | -0.144133         | 0.999971   |
| CXCL5                                 | 4:74861358-74864496   | 2.56062           | 0.00302503 | -0.517607         | 0.999971   | 3.07822           | 0.00302503 |
| CHL1                                  | 3:237440-451265       | 2.51562           | 0.00302503 | 0.500443          | 0.999971   | 2.01518           | 0.00302503 |
| PPM1H                                 | 12:63037798-63328817  | 2.30225           | 0.00302503 | 1.32496           | 0.0491193  | 0.977286          | 0.250867   |
| AL589743.1,RP11-146E13.2,RP11-496I2.4 | 14:19650017-19925346  | 2.29558           | 0.00723681 | 2.17153           | 0.0137916  | 0.124054          | 0.999971   |
| SUSD2                                 | 22:24577226-24585078  | 2.20665           | 0.00302503 | -0.284084         | 0.999971   | 2.49074           | 0.00302503 |
| SERPINE2                              | 2:224839828-224904036 | 2.13461           | 0.00302503 | 1.87439           | 0.00302503 | 0.260226          | 0.999971   |
| XG                                    | X:2669937-2734580     | 2.00282           | 0.00469276 | 1.33964           | 0.277664   | 0.663184          | 0.990104   |
| SFTA1P                                | 10:10826401-10836996  | 1.85582           | 0.00388754 | 1.00614           | 0.452758   | 0.849684          | 0.565782   |
| AP000525.8                            | 22:16147975-16193072  | 1.82934           | 0.00302503 | 1.82142           | 0.00302503 | 0.0079158         | 0.999971   |
| AMIGO2                                | 12:47469489-47630443  | 1.82472           | 0.00302503 | 1.2227            | 0.00302503 | 0.602022          | 0.2818     |
| KISS1                                 | 1:204159468-204165614 | 1.76444           | 0.0276966  | 2.93945           | 0.00302503 | -1.17501          | 0.0544352  |
| FMO3                                  | 1:171060010-171087008 | 1.7533            | 0.00302503 | 1.64992           | 0.00302503 | 0.103374          | 0.999971   |

|                |                        |          |            |            |            |             |            |
|----------------|------------------------|----------|------------|------------|------------|-------------|------------|
| GLIS1          | 1:53971875-54204819    | 1.65244  | 0.0137916  | 1.31816    | 0.0790884  | 0.334281    | 0.999971   |
| SLC7A11        | 4:138948575-139163580  | 1.56363  | 0.00302503 | 0.576032   | 0.351083   | 0.987601    | 0.0112285  |
| WFDC1          | 16:84328229-84363457   | 1.51177  | 0.00302503 | 1.42874    | 0.00302503 | 0.0830339   | 0.999971   |
| ALDH1A1        | 9:75515577-75695358    | 1.51145  | 0.00302503 | 0.187107   | 0.999971   | 1.32435     | 0.00302503 |
| PLCB4          | 20:9049351-9461889     | 1.50913  | 0.00302503 | 1.64647    | 0.00302503 | -0.13734    | 0.999971   |
| SULF1          | 8:70378858-70573150    | 1.49896  | 0.00302503 | 1.08998    | 0.00388754 | 0.408984    | 0.896417   |
| NEK10          | 3:27148387-27411067    | 1.48001  | 0.00302503 | 0.949507   | 0.0616427  | 0.530499    | 0.628053   |
| SLC16A14       | 2:230899486-230934095  | 1.46758  | 0.00388754 | 0.00610671 | 0.999971   | 1.46148     | 0.00469276 |
| ADRA1D         | 20:4201236-4230191     | 1.45214  | 0.0112285  | 2.2127     | 0.00302503 | -0.760564   | 0.382056   |
| PSG1,PSG7,PSG8 | 19:43256837-43441330   | 1.4418   | 0.00302503 | 1.14606    | 0.0150479  | 0.295732    | 0.999971   |
| PSG9           | 19:43715651-43773682   | 1.44172  | 0.00302503 | 0.50763    | 0.875972   | 0.934093    | 0.0330131  |
| ANO4           | 12:101111149-101522419 | 1.43445  | 0.00302503 | 0.347592   | 0.999971   | 1.08686     | 0.141037   |
| PTGS1          | 9:125132823-125158266  | 1.42547  | 0.00302503 | 0.723927   | 0.00469276 | 0.701545    | 0.00388754 |
| CTD-2319I12.1  | 17:58156669-58169246   | 1.38779  | 0.00588648 | -0.172737  | 0.999971   | 1.56053     | 0.00388754 |
| KCNJ2          | 17:68163101-68176189   | 1.38508  | 0.00302503 | 0.679706   | 0.448139   | 0.705372    | 0.226299   |
| TSPAN13        | 7:16793159-16824203    | 1.37264  | 0.00302503 | 0.738973   | 0.0351647  | 0.633664    | 0.0669097  |
| AP000688.8     | 21:37376893-37394325   | 1.32709  | 0.00302503 | 0.743097   | 0.322122   | 0.583995    | 0.425578   |
| OSR2           | 8:99956630-99964503    | 1.31697  | 0.00302503 | 0.325218   | 0.999971   | 0.991753    | 0.0850954  |
| ANGPT1         | 8:108246611-108510300  | 1.3149   | 0.00302503 | 0.403692   | 0.54333    | 0.911212    | 0.00302503 |
| GPR37          | 7:124384367-124406040  | 1.30867  | 0.00302503 | 1.06721    | 0.00989026 | 0.241457    | 0.999971   |
| CHRM2          | 7:136370305-136866854  | 1.22619  | 0.00989026 | 0.734531   | 0.297695   | 0.491664    | 0.727134   |
| SNAP25         | 20:9966735-10349424    | 1.21191  | 0.0124936  | 0.922783   | 0.105993   | 0.289123    | 0.999971   |
| IGFBP2         | 2:217497550-217529159  | 1.17919  | 0.00588648 | 0.85445    | 0.109563   | 0.32474     | 0.999971   |
| WNT5A          | 3:55499740-55523973    | 1.17421  | 0.00302503 | 1.24029    | 0.00302503 | -0.0660868  | 0.999971   |
| EPHB2          | 1:23037331-23241818    | 1.17205  | 0.00302503 | 0.271816   | 0.896579   | 0.900232    | 0.00302503 |
| SEMA6D         | 15:47476297-48066420   | 1.13362  | 0.0351647  | 0.527653   | 0.801914   | 0.605964    | 0.503241   |
| BMP4           | 14:54416453-54425479   | 1.11858  | 0.0112285  | 0.425643   | 0.999971   | 0.692935    | 0.262027   |
| LRRN4CL        | 11:62453873-62457371   | 1.08596  | 0.00302503 | 0.730396   | 0.0964313  | 0.355559    | 0.896417   |
| PLOD2          | 3:145777312-145881440  | 1.08195  | 0.00302503 | 0.966321   | 0.00302503 | 0.115627    | 0.999971   |
| SRGN           | 10:70847861-70864567   | 1.06947  | 0.00302503 | 0.710457   | 0.00302503 | 0.359012    | 0.304714   |
| CORIN          | 4:47595959-47840385    | 1.063    | 0.034065   | 1.88389    | 0.00302503 | -0.820891   | 0.0276966  |
| CPNE7          | 16:89642175-89663654   | 1.04916  | 0.00302503 | 1.08782    | 0.00302503 | -0.0386525  | 0.999971   |
| COL8A1         | 3:99357298-99518070    | 1.04466  | 0.00302503 | 1.04585    | 0.00302503 | -0.00119162 | 0.999971   |
| FMN2           | 1:240177647-240643504  | 1.03789  | 0.0112285  | 0.793293   | 0.168499   | 0.244593    | 0.999971   |
| FAM69A         | 1:93307723-93427057    | 1.03643  | 0.00302503 | 0.499858   | 0.224592   | 0.53657     | 0.0709936  |
| GPNMB          | 7:23275585-23314727    | 1.03451  | 0.00302503 | 0.544574   | 0.0198838  | 0.489935    | 0.0394198  |
| CHAC1          | 15:41245159-41248710   | 0.977631 | 0.00302503 | 0.631254   | 0.140139   | 0.346377    | 0.879342   |
| TLE4           | 9:82186647-82341779    | 0.963763 | 0.0112285  | 0.771467   | 0.0770038  | 0.192296    | 0.999971   |
| LIMS2          | 2:128395955-128439360  | 0.952511 | 0.0124936  | 1.13451    | 0.00302503 | -0.182004   | 0.999971   |

|          |                       |           |            |             |            |            |            |
|----------|-----------------------|-----------|------------|-------------|------------|------------|------------|
| DHRS3    | 1:12627938-12679612   | 0.925434  | 0.00302503 | 0.0311934   | 0.999971   | 0.89424    | 0.00388754 |
| MASP1    | 3:186935941-187009810 | 0.91987   | 0.0112285  | 0.414616    | 0.896417   | 0.505255   | 0.540968   |
| AMPH     | 7:38423304-38671167   | 0.918888  | 0.00302503 | 0.834399    | 0.0175003  | 0.0844891  | 0.999971   |
| RND3     | 2:151324708-151395525 | 0.917223  | 0.00302503 | 0.584009    | 0.00588648 | 0.333214   | 0.517505   |
| TGFB1    | 5:135364583-135399507 | 0.910227  | 0.00302503 | 0.348519    | 0.582247   | 0.561708   | 0.126443   |
| SLC9A3R2 | 16:2075356-2089027    | 0.901016  | 0.00302503 | 0.407535    | 0.250867   | 0.49348    | 0.0501908  |
| EGFL7    | 9:139543061-139567131 | 0.899864  | 0.0426246  | 0.577265    | 0.566761   | 0.322599   | 0.999971   |
| LEPREL1  | 3:189674510-189862635 | 0.896189  | 0.00302503 | 0.722134    | 0.00989026 | 0.174055   | 0.999971   |
| NEDD9    | 6:11173684-11382581   | 0.895117  | 0.00302503 | 0.936184    | 0.00302503 | -0.0410672 | 0.999971   |
| FAM167A  | 8:11197145-11333407   | 0.887282  | 0.00388754 | 0.606888    | 0.176344   | 0.280394   | 0.999971   |
| APBB1IP  | 10:26727090-26857339  | 0.876469  | 0.0383156  | 0.231976    | 0.999971   | 0.644493   | 0.258237   |
| SERPINF1 | 17:1665252-1681183    | 0.871195  | 0.00302503 | -0.391376   | 0.445056   | 1.26257    | 0.00302503 |
| LOX      | 5:121297655-121414246 | 0.870875  | 0.00302503 | 1.31352     | 0.00302503 | -0.442642  | 0.642502   |
| RGCC     | 13:42031665-42045018  | 0.864313  | 0.0137916  | 0.388769    | 0.939229   | 0.475544   | 0.622834   |
| KANK1    | 9:213107-746105       | 0.862027  | 0.00302503 | 0.573613    | 0.0383156  | 0.288414   | 0.855811   |
| FAM101B  | 17:289768-295730      | 0.851016  | 0.00302503 | 0.802211    | 0.00302503 | 0.0488044  | 0.999971   |
| SLC2A1   | 1:43391518-43449029   | 0.847984  | 0.00302503 | 0.699794    | 0.00302503 | 0.14819    | 0.999971   |
| SLC16A3  | 17:80186292-80231607  | 0.83945   | 0.00302503 | 0.861532    | 0.00302503 | -0.0220827 | 0.999971   |
| CHN1     | 2:175664090-175870106 | 0.837281  | 0.00302503 | 0.79232     | 0.00302503 | 0.0449605  | 0.999971   |
| STC2     | 5:172741659-172756506 | 0.823539  | 0.0330131  | 0.437086    | 0.765941   | 0.386453   | 0.934394   |
| S100A4   | 1:153516088-153524887 | 0.813798  | 0.00302503 | -0.182726   | 0.999971   | 0.996523   | 0.00302503 |
| BICC1    | 10:60272754-60591195  | 0.809875  | 0.00302503 | 0.341444    | 0.55573    | 0.468431   | 0.107802   |
| MYO1D    | 17:30819539-31205655  | 0.80743   | 0.0244098  | 0.471513    | 0.59774    | 0.335917   | 0.896417   |
| MID1     | X:10413349-10851773   | 0.793894  | 0.00302503 | 0.223989    | 0.999971   | 0.569905   | 0.00989026 |
| CDH6     | 5:31094083-31329253   | 0.793604  | 0.00302503 | -0.360069   | 0.729694   | 1.15367    | 0.00302503 |
| RCN3     | 19:50030874-50050219  | 0.77507   | 0.00302503 | 0.483236    | 0.0351647  | 0.291834   | 0.560632   |
| TMEM45A  | 3:100211025-100296289 | 0.747777  | 0.00588648 | 0.66891     | 0.0221778  | 0.0788676  | 0.999971   |
| PALLD    | 4:169246986-169931426 | 0.729434  | 0.00302503 | 0.48341     | 0.0501908  | 0.246024   | 0.896417   |
| DCN      | 12:91539024-91576900  | 0.727484  | 0.00388754 | 0.317122    | 0.820957   | 0.410362   | 0.50047    |
| PVRL3    | 3:110607230-110994410 | 0.720104  | 0.00723681 | 0.619933    | 0.0436908  | 0.100172   | 0.999971   |
| DUSP10   | 1:221874765-221915518 | 0.68783   | 0.00469276 | 0.797301    | 0.00302503 | -0.109471  | 0.999971   |
| SERINC2  | 1:31882411-31907525   | 0.663769  | 0.00302503 | 1.02403     | 0.00302503 | -0.360261  | 0.347042   |
| F3       | 1:94993738-95008728   | 0.654209  | 0.00388754 | 0.552419    | 0.0319506  | 0.10179    | 0.999971   |
| ID1      | 20:30181441-30194318  | 0.641282  | 0.00302503 | 0.409179    | 0.184085   | 0.232103   | 0.896417   |
| CLDN11   | 3:170136652-170578169 | -0.605413 | 0.00302503 | -0.00824016 | 0.999971   | -0.597172  | 0.00302503 |
| GEM      | 8:95261478-95274578   | -0.693816 | 0.00388754 | -0.259613   | 0.894717   | -0.434203  | 0.204096   |
| HLA-A    | 6:29855070-29913661   | -0.703213 | 0.00302503 | -0.314701   | 0.767687   | -0.388512  | 0.392301   |
| CORO2B   | 15:68871307-69020145  | -0.713295 | 0.00302503 | -0.493489   | 0.0288343  | -0.219806  | 0.95797    |
| SDPR     | 2:192699027-193060490 | -0.71856  | 0.00723681 | -0.0747569  | 0.999971   | -0.643803  | 0.0137916  |

|             |                        |           |            |            |            |             |            |
|-------------|------------------------|-----------|------------|------------|------------|-------------|------------|
| KRT19       | 17:39679868-39684693   | -0.721253 | 0.00856372 | -0.307106  | 0.896417   | -0.414147   | 0.669306   |
| MDGA1       | 6:37598454-37667082    | -0.735376 | 0.00388754 | -0.627497  | 0.0124936  | -0.107878   | 0.999971   |
| MARCKSL1    | 1:32799432-32801980    | -0.740621 | 0.00302503 | -0.52477   | 0.0276966  | -0.215851   | 0.999971   |
| SLIT2       | 4:20253351-20623803    | -0.741785 | 0.00723681 | -0.6899    | 0.0150479  | -0.0518853  | 0.999971   |
| EFEMP1      | 2:56093101-56151274    | -0.743544 | 0.00302503 | -0.64853   | 0.00302503 | -0.095014   | 0.999971   |
| SCARA3      | 8:27491384-27534190    | -0.753844 | 0.00302503 | -0.117969  | 0.999971   | -0.635875   | 0.00989026 |
| GPR126      | 6:142622990-142767652  | -0.75515  | 0.0480437  | -0.4028    | 0.645311   | -0.35235    | 0.950059   |
| GDF5        | 20:34020826-34042568   | -0.783599 | 0.00989026 | -0.507057  | 0.247107   | -0.276542   | 0.999971   |
| ENPP2       | 8:120569323-120685693  | -0.793009 | 0.00302503 | -0.992212  | 0.00302503 | 0.199204    | 0.999971   |
| SFRP1       | 8:41119480-41167016    | -0.795026 | 0.00302503 | -0.694752  | 0.00723681 | -0.100273   | 0.999971   |
| RRAD        | 16:66955581-66959547   | -0.80254  | 0.0298268  | -0.0989519 | 0.999971   | -0.703588   | 0.168499   |
| PBX1        | 1:164524820-164868533  | -0.837945 | 0.00469276 | -0.999217  | 0.00302503 | 0.161272    | 0.999971   |
| CDCA7       | 2:174202946-174233725  | -0.841555 | 0.0298268  | -0.820206  | 0.0298268  | -0.0213485  | 0.999971   |
| ABLIM1      | 10:116190808-116539662 | -0.883883 | 0.0426246  | -0.781176  | 0.0575555  | -0.102707   | 0.999971   |
| RARRES2     | 7:150035407-150038763  | -0.884366 | 0.00388754 | -1.71935   | 0.00302503 | 0.834982    | 0.0162705  |
| FNBP1L      | 1:93913586-94020356    | -0.88512  | 0.00302503 | -0.512738  | 0.258237   | -0.372382   | 0.847124   |
| CSRP2       | 12:77252002-77274132   | -0.89494  | 0.00302503 | -0.835992  | 0.00302503 | -0.0589481  | 0.999971   |
| P2RY1       | 3:152552586-152559228  | -0.898803 | 0.0150479  | -1.70779   | 0.00302503 | 0.808986    | 0.166874   |
| OSBPL8      | 12:76745310-76953589   | -0.913699 | 0.00856372 | -0.748986  | 0.0276966  | -0.164713   | 0.999971   |
| MAP2        | 2:210288729-210599089  | -0.926916 | 0.00856372 | -1.37237   | 0.00302503 | 0.44545     | 0.593664   |
| NFIB        | 9:14081841-14398982    | -0.949975 | 0.00302503 | -0.947899  | 0.00302503 | -0.00207633 | 0.999971   |
| LCNL1,PTGDS | 9:139871955-139880862  | -0.975761 | 0.00302503 | -1.19521   | 0.00302503 | 0.21945     | 0.999971   |
| IGJ         | 4:71494460-71552533    | -0.983826 | 0.0276966  | -1.54752   | 0.00302503 | 0.563694    | 0.676214   |
| F2RL1       | 5:76114680-76131214    | -0.996228 | 0.00302503 | -0.675349  | 0.025545   | -0.320878   | 0.961697   |
| SLC40A1     | 2:190425304-190448484  | -0.99809  | 0.00302503 | -1.87681   | 0.00302503 | 0.878721    | 0.00723681 |
| NDNF        | 4:121952327-122001631  | -1.01702  | 0.00302503 | -1.24948   | 0.00302503 | 0.23246     | 0.999971   |
| RNF128      | X:105937023-106040223  | -1.03593  | 0.00302503 | -0.19563   | 0.999971   | -0.840298   | 0.00723681 |
| SNED1       | 2:241938157-242041747  | -1.04794  | 0.0351647  | -0.842998  | 0.2956     | -0.204938   | 0.999971   |
| ADAMTS15    | 11:130317906-130346541 | -1.07791  | 0.00302503 | -1.06821   | 0.00302503 | -0.00969856 | 0.999971   |
| RHOJ        | 14:63670831-63760353   | -1.07992  | 0.00388754 | -0.594038  | 0.364149   | -0.485879   | 0.825553   |
| CLU         | 8:27454433-27472548    | -1.07994  | 0.00302503 | 0.106592   | 0.999971   | -1.18654    | 0.00388754 |
| AC109642.1  | 2:30569354-30584134    | -1.12109  | 0.00723681 | -1.44813   | 0.00302503 | 0.327042    | 0.999971   |
| ESM1        | 5:54273691-54330398    | -1.12727  | 0.00302503 | -0.0270261 | 0.999971   | -1.10024    | 0.00302503 |
| ADCY8       | 8:131792546-132054764  | -1.12903  | 0.0175003  | -0.958707  | 0.0426246  | -0.170322   | 0.999971   |
| PODXL       | 7:131184632-131242976  | -1.12978  | 0.00302503 | -0.363711  | 0.790621   | -0.766071   | 0.059618   |
| DCHS1       | 11:6642555-6677573     | -1.13556  | 0.00302503 | -0.905467  | 0.00302503 | -0.23009    | 0.999971   |
| MAOB        | X:43625772-43741693    | -1.13845  | 0.00302503 | -0.87574   | 0.00469276 | -0.262706   | 0.999971   |
| MAN1C1      | 1:25943306-26112698    | -1.19178  | 0.00302503 | -1.15725   | 0.00302503 | -0.0345257  | 0.999971   |
| TMSB15A     | X:101768603-101771712  | -1.19691  | 0.00588648 | -0.568347  | 0.612937   | -0.628558   | 0.615367   |

|                         |                        |          |            |           |            |           |            |
|-------------------------|------------------------|----------|------------|-----------|------------|-----------|------------|
| TNC                     | 9:117782805-117880765  | -1.21006 | 0.00302503 | -0.861244 | 0.00388754 | -0.348821 | 0.844404   |
| UNC5C                   | 4:96083654-96470414    | -1.21554 | 0.00989026 | -1.5544   | 0.00388754 | 0.33886   | 0.999971   |
| SEMA3D                  | 7:84624352-84816355    | -1.25089 | 0.0198838  | -0.263978 | 0.999971   | -0.986914 | 0.152107   |
| ADORA1                  | 1:203059781-203136614  | -1.26392 | 0.00302503 | -1.2921   | 0.00302503 | 0.0281808 | 0.999971   |
| APOE                    | 19:45409010-45412650   | -1.27245 | 0.00302503 | -0.296156 | 0.999971   | -0.976297 | 0.0362438  |
| NHSL2                   | X:71130737-71381600    | -1.38574 | 0.00302503 | -1.14171  | 0.0416127  | -0.244035 | 0.999971   |
| CDON                    | 11:125820010-125933230 | -1.38809 | 0.00302503 | -1.546    | 0.00302503 | 0.157909  | 0.999971   |
| MAFB                    | 20:39314487-39317880   | -1.41324 | 0.00302503 | -1.09403  | 0.00469276 | -0.319213 | 0.999971   |
| CADM1                   | 11:115039937-115375675 | -1.43442 | 0.00302503 | -0.313234 | 0.999971   | -1.12118  | 0.00588648 |
| TBX4                    | 17:59529764-59562471   | -1.47219 | 0.00302503 | -1.17466  | 0.00302503 | -0.297539 | 0.999971   |
| NCAM1                   | 11:112830001-113185159 | -1.47331 | 0.00388754 | -0.187486 | 0.999971   | -1.28583  | 0.0288343  |
| FAM213A                 | 10:82167584-82195320   | -1.47801 | 0.00302503 | -0.959602 | 0.030883   | -0.518405 | 0.852231   |
| VSNL1                   | 2:17719976-17838285    | -1.48555 | 0.00856372 | -0.288147 | 0.999971   | -1.19741  | 0.098291   |
| SEMA3F                  | 3:49977439-50226508    | -1.50488 | 0.0124936  | -1.52978  | 0.0383156  | 0.0249019 | 0.999971   |
| NR4A3                   | 9:102583950-102629249  | -1.50936 | 0.00302503 | -0.556109 | 0.57501    | -0.953248 | 0.0740196  |
| NCAM2                   | 21:22370604-22915650   | -1.5389  | 0.00302503 | -0.317883 | 0.999971   | -1.22101  | 0.00856372 |
| PALM                    | 19:708952-748329       | -1.59906 | 0.00302503 | -1.36195  | 0.00302503 | -0.237106 | 0.999971   |
| GPRC5C                  | 17:72420989-72447792   | -1.61414 | 0.034065   | -2.41437  | 0.00302503 | 0.800232  | 0.896417   |
| PITX2                   | 4:111538578-111563279  | -1.69515 | 0.00302503 | -1.87806  | 0.00388754 | 0.182918  | 0.999971   |
| COL14A1                 | 8:121072018-121385732  | -1.76617 | 0.00302503 | -2.09567  | 0.00302503 | 0.329496  | 0.999971   |
| FGF18                   | 5:170845578-170884627  | -1.83263 | 0.00588648 | -0.891826 | 0.465343   | -0.940801 | 0.538089   |
| MMP1                    | 11:102617698-102714534 | -1.86491 | 0.00302503 | -1.18197  | 0.00723681 | -0.682941 | 0.743673   |
| DES                     | 2:220283098-220291461  | -1.90839 | 0.00302503 | -1.56993  | 0.00302503 | -0.338461 | 0.999971   |
| NDP                     | X:43808021-43832939    | -2.00174 | 0.00302503 | -0.651735 | 0.462013   | -1.35001  | 0.0124936  |
| GDF10                   | 10:48425784-48439152   | -2.02977 | 0.00302503 | -3.44738  | 0.00302503 | 1.4176    | 0.0491193  |
| IGSF10                  | 3:150803483-151179030  | -2.19864 | 0.00302503 | -2.04226  | 0.00302503 | -0.156378 | 0.999971   |
| RPL9                    | 4:39453853-39460568    | -2.20071 | 0.00302503 | -0.333382 | 0.999971   | -1.86733  | 0.00302503 |
| C8orf4                  | 8:40010988-40012821    | -2.25663 | 0.00302503 | -2.11322  | 0.00302503 | -0.143415 | 0.999971   |
| LAMP5                   | 20:9485826-9511171     | -2.54364 | 0.00302503 | -1.09282  | 0.00302503 | -1.45083  | 0.00302503 |
| TRIM55                  | 8:67039130-67088001    | -2.60438 | 0.00302503 | -2.16867  | 0.00302503 | -0.435707 | 0.999971   |
| CHRDL1                  | X:109916844-110039504  | -2.67569 | 0.00302503 | -0.814892 | 0.169321   | -1.8608   | 0.00302503 |
| IGFN1                   | 1:201159896-201198080  | -2.86057 | 0.00302503 | -4.9559   | 0.00302503 | 2.09534   | 0.00302503 |
| FXVD2,FXVD6,FXVD6-FXYD2 | 11:117298488-117748201 | -2.93575 | 0.00302503 | -1.00111  | 0.785179   | -1.93464  | 0.0800398  |
| RORB                    | 9:77100466-77308094    | -3.04905 | 0.00302503 | -0.972425 | 0.223899   | -2.07663  | 0.12833    |
| GAP43                   | 3:115342170-115440337  | -3.33626 | 0.00302503 | -2.87335  | 0.00302503 | -0.462914 | 0.999971   |
| MYH11                   | 16:15737123-15950890   | -3.93173 | 0.00388754 | -4.23497  | 0.00302503 | 0.303238  | 0.999971   |
| SLCO2A1                 | 3:133651539-133771028  | -4.02305 | 0.00302503 | -1.14208  | 0.299661   | -2.88098  | 0.00302503 |

SSc vs IPF DEGs

| gene                        | locus                  | SSc vs Normal     |            | IPF vs Normal     |            | SSc vs IPF        |            |
|-----------------------------|------------------------|-------------------|------------|-------------------|------------|-------------------|------------|
|                             |                        | log2(fold_change) | q_value    | log2(fold_change) | q_value    | log2(fold_change) | q_value    |
| IL8                         | 4:74606222-74609433    | 2.6777            | 0.00302503 | -0.917577         | 0.55653    | 3.59528           | 0.00302503 |
| CXCL5                       | 4:74861358-74864496    | 2.56062           | 0.00302503 | -0.517607         | 0.999971   | 3.07822           | 0.00302503 |
| TMEM176A                    | 7:150488372-150502208  | 0.731282          | 0.999971   | -2.13973          | 0.0124936  | 2.87101           | 0.0137916  |
| EDNRB                       | 13:78469615-78493903   | 1.17874           | 0.0288343  | -1.51349          | 0.0501908  | 2.69223           | 0.00302503 |
| RUNX3                       | 1:25226001-25291612    | 2.79463           | 0.00302503 | 0.118147          | 0.999971   | 2.67648           | 0.00302503 |
| CHI3L1                      | 1:203148023-203155877  | -1.03411          | 0.00302503 | -3.56539          | 0.00302503 | 2.53128           | 0.00302503 |
| SUSD2                       | 22:24577226-24585078   | 2.20665           | 0.00302503 | -0.284084         | 0.999971   | 2.49074           | 0.00302503 |
| TOX                         | 8:59715079-60033905    | 2.99944           | 0.00302503 | 0.67698           | 0.999971   | 2.32246           | 0.00302503 |
| CHL1                        | 3:237440-451265        | 2.51562           | 0.00302503 | 0.500443          | 0.999971   | 2.01518           | 0.00302503 |
| LIMS3                       | 2:110656004-110742667  | 0.736754          | 0.606995   | -0.865708         | 0.678526   | 1.60246           | 0.0319506  |
| CTD-2319I12.1               | 17:58156669-58169246   | 1.38779           | 0.00588648 | -0.172737         | 0.999971   | 1.56053           | 0.00388754 |
| INSC                        | 11:15133969-15291142   | 1.67843           | 0.0909025  | 0.127049          | 0.999971   | 1.55138           | 0.0233069  |
| SLC16A14                    | 2:230899486-230934095  | 1.46758           | 0.00388754 | 0.00610671        | 0.999971   | 1.46148           | 0.00469276 |
| GDF10                       | 10:48425784-48439152   | -2.02977          | 0.00302503 | -3.44738          | 0.00302503 | 1.4176            | 0.0491193  |
| TMEM119                     | 12:108983621-108992096 | 0.50707           | 0.0890229  | -0.824454         | 0.00302503 | 1.33152           | 0.00302503 |
| ALDH1A1                     | 9:75515577-75695358    | 1.51145           | 0.00302503 | 0.187107          | 0.999971   | 1.32435           | 0.00302503 |
| VAMP8                       | 2:85788684-85809154    | -0.315816         | 0.999971   | -1.59497          | 0.00302503 | 1.27916           | 0.0124936  |
| SERPINF1                    | 17:1665252-1681183     | 0.871195          | 0.00302503 | -0.391376         | 0.445056   | 1.26257           | 0.00302503 |
| BDKRB1,BDKRB2,RP11-404P21.8 | 14:96671015-96735304   | 0.663952          | 0.135538   | -0.566953         | 0.29089    | 1.2309            | 0.00302503 |
| PEAR1                       | 1:156863148-156886226  | 0.532751          | 0.144725   | -0.697383         | 0.0319506  | 1.23013           | 0.00302503 |
| GOS2                        | 1:209834708-209915895  | -0.157915         | 0.999971   | -1.319            | 0.00989026 | 1.16108           | 0.0244098  |
| CDH6                        | 5:31094083-31329253    | 0.793604          | 0.00302503 | -0.360069         | 0.729694   | 1.15367           | 0.00302503 |
| AKR1C3                      | 10:5077548-5149878     | 0.493203          | 0.39349    | -0.63387          | 0.237713   | 1.12707           | 0.00302503 |
| COLEC12                     | 18:319360-500722       | -0.134184         | 0.999971   | -1.21622          | 0.00302503 | 1.08204           | 0.00302503 |
| LDB2                        | 4:16402052-16900432    | 0.631239          | 0.348742   | -0.436984         | 0.994636   | 1.06822           | 0.0351647  |
| SIX1                        | 14:61110131-61125672   | -0.293105         | 0.999971   | -1.36049          | 0.00302503 | 1.06738           | 0.0150479  |
| VWA5A                       | 11:123986068-124018428 | 0.424423          | 0.638517   | -0.602565         | 0.19265    | 1.02699           | 0.00302503 |
| S100A4                      | 1:153516088-153524887  | 0.813798          | 0.00302503 | -0.182726         | 0.999971   | 0.996523          | 0.00302503 |
| PIR                         | X:15402920-15574652    | 0.8832            | 0.0298268  | -0.0958849        | 0.999971   | 0.979085          | 0.0175003  |
| PCDH18                      | 4:138440071-138453804  | 0.658269          | 0.00588648 | -0.31637          | 0.7145     | 0.974639          | 0.00302503 |
| PRKG2                       | 4:82007662-82137627    | 0.0254716         | 0.999971   | -0.940984         | 0.00302503 | 0.966456          | 0.0162705  |
| TNFRSF21                    | 6:47199267-47277735    | 0.228251          | 0.999971   | -0.70709          | 0.0298268  | 0.935342          | 0.00302503 |
| ANGPT1                      | 8:108246611-108510300  | 1.3149            | 0.00302503 | 0.403692          | 0.54333    | 0.911212          | 0.00302503 |
| EPHB2                       | 1:23037331-23241818    | 1.17205           | 0.00302503 | 0.271816          | 0.896579   | 0.900232          | 0.00302503 |
| DHRS3                       | 1:12627938-12679612    | 0.925434          | 0.00302503 | 0.0311934         | 0.999971   | 0.89424           | 0.00388754 |
| FBLN1                       | 22:45898117-45997044   | 0.467574          | 0.190941   | -0.413248         | 0.322122   | 0.880822          | 0.00302503 |
| SLC40A1                     | 2:190425304-190448484  | -0.99809          | 0.00302503 | -1.87681          | 0.00302503 | 0.878721          | 0.00723681 |

|          |                        |            |            |             |            |           |            |
|----------|------------------------|------------|------------|-------------|------------|-----------|------------|
| NQO1     | 16:69740898-69760854   | 0.774441   | 0.00302503 | -0.103614   | 0.999971   | 0.878055  | 0.00302503 |
| GUCY1B3  | 4:156680032-156728746  | 0.0368626  | 0.999971   | -0.831847   | 0.0426246  | 0.86871   | 0.0372946  |
| SCN4B    | 11:118004091-118023762 | -0.478087  | 0.418586   | -1.27878    | 0.00302503 | 0.800695  | 0.0266209  |
| TNFRSF19 | 13:24144506-24250232   | -0.357083  | 0.509991   | -1.14053    | 0.00302503 | 0.783445  | 0.00469276 |
| AKR1C1   | 10:4934795-5060207     | 0.200264   | 0.999971   | -0.541462   | 0.162493   | 0.741726  | 0.00856372 |
| PTGS1    | 9:125132823-125158266  | 1.42547    | 0.00302503 | 0.723927    | 0.00469276 | 0.701545  | 0.00388754 |
| HMOX1    | 22:35776353-35790207   | 0.578305   | 0.00469276 | -0.116513   | 0.999971   | 0.694818  | 0.00302503 |
| CLDN11   | 3:170136652-170578169  | -0.605413  | 0.00302503 | -0.00824016 | 0.999971   | -0.597172 | 0.00302503 |
| SDPR     | 2:192699027-193060490  | -0.71856   | 0.00723681 | -0.0747569  | 0.999971   | -0.643803 | 0.0137916  |
| RPS4Y1   | Y:2709526-2800041      | 0.0326085  | 0.999971   | 0.702878    | 0.0586144  | -0.670269 | 0.0458797  |
| MAMDC2   | 9:72658496-72873782    | 0.0557389  | 0.999971   | 0.813716    | 0.00723681 | -0.757977 | 0.0266209  |
| IGFBP5   | 2:217536827-217858722  | 0.236752   | 0.999971   | 1.05428     | 0.00302503 | -0.81753  | 0.00302503 |
| RNF128   | X:105937023-106040223  | -1.03593   | 0.00302503 | -0.19563    | 0.999971   | -0.840298 | 0.00723681 |
| CDH13    | 16:82660407-83841439   | -0.37212   | 0.896417   | 0.554625    | 0.114199   | -0.926745 | 0.0162705  |
| HOPX     | 4:57514154-57548065    | -0.743457  | 0.245735   | 0.217247    | 0.999971   | -0.960704 | 0.0447753  |
| CTSH     | 15:79213399-79241916   | -0.15947   | 0.999971   | 0.873137    | 0.132873   | -1.03261  | 0.0362438  |
| SSTR1    | 14:38675857-38682272   | 0.0621314  | 0.999971   | 1.14106     | 0.00302503 | -1.07893  | 0.00302503 |
| ESM1     | 5:54273691-54330398    | -1.12727   | 0.00302503 | -0.0270261  | 0.999971   | -1.10024  | 0.00302503 |
| CADM1    | 11:115039937-115375675 | -1.43442   | 0.00302503 | -0.313234   | 0.999971   | -1.12118  | 0.00588648 |
| SYNPO2   | 4:119809995-119982402  | -0.386278  | 0.672307   | 0.804673    | 0.00302503 | -1.19095  | 0.00302503 |
| OXTR     | 3:8661085-9005457      | -0.0877144 | 0.999971   | 1.17228     | 0.0890229  | -1.25999  | 0.0288343  |
| BEX1     | X:102317578-102319168  | 0.317879   | 0.999971   | 1.70896     | 0.00723681 | -1.39108  | 0.00856372 |
| NRXN3    | 14:78708733-80331052   | -1.14913   | 0.00856372 | 0.251236    | 0.999971   | -1.40036  | 0.00302503 |
| TPTEP1   | 22:17082231-17185367   | -0.961054  | 0.258237   | 0.682343    | 0.250867   | -1.6434   | 0.00302503 |
| RPL9     | 4:39453853-39460568    | -2.20071   | 0.00302503 | -0.333382   | 0.999971   | -1.86733  | 0.00302503 |
| DSG2     | 18:29078005-29136874   | -0.69424   | 0.68105    | 1.18478     | 0.00302503 | -1.87902  | 0.00469276 |
| GRPR     | X:16026785-16189587    | -1.40371   | 0.0955995  | 0.489856    | 0.999971   | -1.89357  | 0.00469276 |
| KPRP     | 1:152730505-152734529  | -1.43901   | 0.0298268  | 0.571522    | 0.999971   | -2.01053  | 0.00388754 |
| GPAT2    | 2:96676307-96705199    | -0.176993  | 0.999971   | 1.89291     | 0.0137916  | -2.0699   | 0.0150479  |

Table S5

Differentially expressed miRNAs across all patient lung fibroblast comparisons ( $\geq + 1.35$ -fold or  $\leq - 1.35$ -fold,  $p < 0.1$ )

| miRNA ID                           | Fold change | <i>p</i> -value | Association with fibrosis                                                                                                                                                                                                                                                                                                                   |
|------------------------------------|-------------|-----------------|---------------------------------------------------------------------------------------------------------------------------------------------------------------------------------------------------------------------------------------------------------------------------------------------------------------------------------------------|
| <i>IPF vs Ctl</i><br>(significant) |             |                 |                                                                                                                                                                                                                                                                                                                                             |
| hsa-miR-138-5p                     | -1.96       | 8.71E-02        | Inhibits human hypertrophic scar fibroblast proliferation and movement in vitro[8]. Inhibits the osteogenic differentiation of hMSCs and bone formation in vivo[9,10]. Suppresses epithelial-mesenchymal transition in squamous cell carcinoma cell lines[11]. Decreased expression in IPF lung[12].                                        |
| hsa-miR-146b-5p                    | -1.86       | 4.66E-03        | Targets SMAD4 and affects TGF- $\beta$ signaling[13]. Expression reduced in CAFs and inhibits activation, migration, and invasion of breast stromal fibroblasts[14]. Closely related miR-146a has been shown to inhibit TGF- $\beta$ -mediated activation of dermal fibroblasts and HSCs, and inhibited renal fibrosis in UUO model[15–17]. |
| hsa-miR-155-5p                     | -1.83       | 1.38E-03        | Downregulated by TGF- $\beta$ in lung fibroblasts[18]. Targets SMAD2 and affects TGF- $\beta$ -dependent gene expression in THP1 cells, however was found to facilitate TGF- $\beta$ -induced EMT in mammary gland epithelial cells[19,20]. Increased expression in IPF lung[12].                                                           |
| hsa-miR-190a-5p                    | -1.69       | 4.38E-04        | Inhibits TGF- $\beta$ signaling[21].                                                                                                                                                                                                                                                                                                        |
| hsa-miR-125b-2-3p                  | -1.62       | 1.83E-03        |                                                                                                                                                                                                                                                                                                                                             |
| hsa-miR-708-3p                     | -1.59       | 4.07E-03        |                                                                                                                                                                                                                                                                                                                                             |



|                                 |       |          |                                                                                                                                                                                                                                                                                                                                             |
|---------------------------------|-------|----------|---------------------------------------------------------------------------------------------------------------------------------------------------------------------------------------------------------------------------------------------------------------------------------------------------------------------------------------------|
| hsa-miR-20a-5p                  | -1.53 | 3.60E-03 | Part of mir17~92 cluster. Cluster is downregulated in IPF lung and fibroblasts. mir17~92 cluster reverses IPF fibroblast activation[22].                                                                                                                                                                                                    |
| hsa-miR-374a-3p                 | -1.52 | 2.04E-03 |                                                                                                                                                                                                                                                                                                                                             |
| hsa-miR-21-3p                   | -1.49 | 2.18E-02 |                                                                                                                                                                                                                                                                                                                                             |
| hsa-miR-340-5p                  | -1.46 | 4.18E-03 | Upregulated in liver fibrosis models[23]. Enhances TGF- $\beta$ signaling[21].                                                                                                                                                                                                                                                              |
| hsa-miR-17-5p                   | -1.43 | 1.58E-03 | Part of mir17~92 cluster. Cluster is downregulated in IPF lung and fibroblasts. mir17~92 cluster reverses IPF fibroblast activation[22].                                                                                                                                                                                                    |
| hsa-miR-1307-5p                 | -1.43 | 2.17E-02 |                                                                                                                                                                                                                                                                                                                                             |
| hsa-miR-99a-5p                  | -1.42 | 9.70E-03 |                                                                                                                                                                                                                                                                                                                                             |
| hsa-miR-345-5p                  | -1.40 | 1.52E-02 | Targets SMAD1[24].                                                                                                                                                                                                                                                                                                                          |
| hsa-miR-7974                    | -1.39 | 7.45E-02 |                                                                                                                                                                                                                                                                                                                                             |
| hsa-miR-93-5p                   | -1.37 | 1.16E-02 | Modulates TGF- $\beta$ signaling[21,25–28]. Targets SMAD7, TGF $\beta$ R2[26,28]. Downregulated in slowly progressive IPF lung[29].                                                                                                                                                                                                         |
| hsa-miR-335-5p                  | 2.27  | 9.45E-02 | Levels reduced during HSC activation, inhibits HSC migration/activation[30]. Plays a role in osteogenic differentiation and chondrogenesis[31,32].                                                                                                                                                                                          |
| hsa-miR-30a-3p                  | 1.38  | 5.48E-02 | Reduced expression in IPF lung[33].                                                                                                                                                                                                                                                                                                         |
| hsa-miR-574-3p                  | 1.37  | 7.89E-03 |                                                                                                                                                                                                                                                                                                                                             |
| <i>SSc vs Ctl (significant)</i> |       |          |                                                                                                                                                                                                                                                                                                                                             |
| hsa-miR-146b-5p                 | -1.93 | 3.01E-03 | Targets SMAD4 and affects TGF- $\beta$ signaling[13]. Expression reduced in CAFs and inhibits activation, migration, and invasion of breast stromal fibroblasts[14]. Closely related miR-146a has been shown to inhibit TGF- $\beta$ -mediated activation of dermal fibroblasts and HSCs, and inhibited renal fibrosis in UUO model[15–17]. |
| hsa-miR-708-3p                  | -1.59 | 4.10E-03 |                                                                                                                                                                                                                                                                                                                                             |

|                 |       |          |                                                                                                                                                                                                                                                                                                                       |
|-----------------|-------|----------|-----------------------------------------------------------------------------------------------------------------------------------------------------------------------------------------------------------------------------------------------------------------------------------------------------------------------|
| hsa-miR-20a-5p  | -1.50 | 5.47E-03 | Part of mir17~92 cluster. Cluster is downregulated in IPF lung and fibroblasts. mir17~92 cluster reverses IPF fibroblast activation[22].                                                                                                                                                                              |
| hsa-miR-21-3p   | -1.47 | 2.46E-02 |                                                                                                                                                                                                                                                                                                                       |
| hsa-miR-17-5p   | -1.44 | 1.32E-03 | Part of mir17~92 cluster. Cluster is downregulated in IPF lung and fibroblasts. mir17~92 cluster reverses IPF fibroblast activation[22].                                                                                                                                                                              |
| hsa-miR-190a-5p | -1.44 | 1.02E-02 | Inhibits TGF- $\beta$ signaling[21].                                                                                                                                                                                                                                                                                  |
| hsa-miR-155-5p  | -1.43 | 4.74E-02 | Downregulated by TGF- $\beta$ in lung fibroblasts[18]. Targets SMAD2 and affects TGF- $\beta$ -dependent gene expression in THP1 cells, however was found to facilitate TGF- $\beta$ -induced EMT in mammary gland epithelial cells[19,20]. Increased expression in IPF lung[12].                                     |
| hsa-miR-29b-3p  | -1.38 | 7.31E-02 | miR-29 family is downregulated in several fibrosis models and human fibrotic disease. Attenuates fibrosis in mouse models of lung, cardiac, liver, and kidney fibrosis. Affects fibroblast/HSC activity. Targets ECM and pro-fibrotic pathway genes[12,34–46].                                                        |
| hsa-miR-345-5p  | -1.38 | 1.96E-02 | Targets SMAD1[24].                                                                                                                                                                                                                                                                                                    |
| hsa-miR-101-3p  | -1.38 | 6.53E-03 | Inhibits TGF- $\beta$ -induced EMT in hepatocytes[47]. Attenuates TGF- $\beta$ pathway and targets TGF $\beta$ R1. Suppresses liver fibrosis in mice and promotes HSC deactivation in vitro[48]. Downregulated in serum and lung of IPF patients[29,49]. Inhibited post infarct cardiac fibrosis in rat MI model[50]. |
| hsa-miR-374a-3p | -1.38 | 1.49E-02 |                                                                                                                                                                                                                                                                                                                       |
| hsa-miR-340-5p  | -1.35 | 1.86E-02 | Upregulated in liver fibrosis models[23]. Enhances TGF- $\beta$ signaling[21].                                                                                                                                                                                                                                        |

|                                 |       |          |                                                                                                                                                                                                                                                                          |
|---------------------------------|-------|----------|--------------------------------------------------------------------------------------------------------------------------------------------------------------------------------------------------------------------------------------------------------------------------|
| hsa-miR-199b-5p                 | 1.80  | 1.76E-02 | Increased expression of miR-199a in CCL4-induced liver fibrosis and human liver fibrosis. miR-199a increases expression of fibrosis genes in HSCs[51]. miR-199a mediates TGF- $\beta$ -induced activation of lung fibroblasts[52]. Increased expression in IPF lung[33]. |
| hsa-miR-486-5p                  | 1.72  | 4.53E-02 | Downregulated in mouse models of lung fibrosis and in IPF. Mimics inhibited a mouse model of lung fibrosis and TGF- $\beta$ -induced fibrogenesis in mouse fibroblasts. Targets SMAD2[53].                                                                               |
| hsa-miR-431-5p                  | 1.61  | 1.16E-03 |                                                                                                                                                                                                                                                                          |
| hsa-miR-432-5p                  | 1.50  | 1.16E-03 | Increased expression in IPF lungs[33].                                                                                                                                                                                                                                   |
| hsa-miR-654-3p                  | 1.49  | 1.90E-04 | Increased expression in IPF lungs[33].                                                                                                                                                                                                                                   |
| hsa-miR-127-3p                  | 1.45  | 1.32E-03 | Increased expression in IPF lungs[33].                                                                                                                                                                                                                                   |
| hsa-miR-409-3p                  | 1.45  | 1.91E-03 | Increased expression in IPF lungs[33].                                                                                                                                                                                                                                   |
| hsa-miR-370-3p                  | 1.42  | 3.92E-04 | Reduced expression in CCL <sub>4</sub> liver fibrosis and TGF- $\beta$ -stimulated HSCs. Suppressed activation of HSCs and attenuated CCL <sub>4</sub> -induced liver fibrosis[54]. Increased expression in IPF lungs[33].                                               |
| hsa-miR-134-5p                  | 1.41  | 7.27E-04 | Increased expression in IPF lungs[12].                                                                                                                                                                                                                                   |
| hsa-miR-493-3p                  | 1.40  | 8.74E-04 |                                                                                                                                                                                                                                                                          |
| hsa-miR-410-3p                  | 1.36  | 4.10E-03 | Increased expression in IPF lungs[33].                                                                                                                                                                                                                                   |
| hsa-miR-411-5p                  | 1.35  | 7.37E-03 | Increased expression in IPF lungs[33].                                                                                                                                                                                                                                   |
| <i>IPF vs SSc (significant)</i> |       |          |                                                                                                                                                                                                                                                                          |
| hsa-miR-125b-2-3p               | -1.65 | 1.23E-03 |                                                                                                                                                                                                                                                                          |
| hsa-miR-99a-5p                  | -1.59 | 9.44E-04 |                                                                                                                                                                                                                                                                          |
| hsa-miR-199b-5p                 | -1.57 | 6.52E-02 | Increased expression of miR-199a in CCL4-induced liver fibrosis and human liver fibrosis. miR-199a increases expression of fibrosis genes in HSCs[51]. miR-199a mediates TGF- $\beta$ -induced activation of lung fibroblasts[52]. Increased expression in IPF lung[33]. |
| hsa-miR-431-5p                  | -1.42 | 1.36E-02 |                                                                                                                                                                                                                                                                          |

|                |       |          |                                                                                                                                                    |
|----------------|-------|----------|----------------------------------------------------------------------------------------------------------------------------------------------------|
| hsa-miR-381-3p | -1.39 | 1.08E-02 | Increased expression in IPF lungs[33].                                                                                                             |
| hsa-miR-411-5p | -1.37 | 6.02E-03 | Increased expression in IPF lungs[33].                                                                                                             |
| hsa-miR-335-5p | 2.24  | 9.85E-02 | Levels reduced during HSC activation, inhibits HSC migration/activation[30]. Plays a role in osteogenic differentiation and chondrogenesis[31,32]. |

1. Hsu, E.; Shi, H.; Jordan, R. M.; Lyons-Weiler, J.; Pilewski, J. M.; Feghali-Bostwick, C. A. Lung tissues in patients with systemic sclerosis have gene expression patterns unique to pulmonary fibrosis and pulmonary hypertension. *Arthritis Rheum* **2011**, *63*, 783–94, doi:10.1002/art.30159.
2. Huang da, W.; Sherman, B. T.; Lempicki, R. A. Systematic and integrative analysis of large gene lists using DAVID bioinformatics resources. *Nat Protoc* **2009**, *4*, 44–57, doi:10.1038/nprot.2008.211.
3. Supek, F.; Bosnjak, M.; Skunca, N.; Smuc, T. REVIGO summarizes and visualizes long lists of gene ontology terms. *PLoS One* **2011**, *6*, e21800, doi:10.1371/journal.pone.0021800.
4. Wettlaufer, S. H.; Scott, J. P.; McEachin, R. C.; Peters-Golden, M.; Huang, S. K. Myofibroblast Dedifferentiation by PGE is Characterized by Reversal of the Global Transcriptome. *Am J Respir Cell Mol Biol* **2015**, doi:10.1165/rcmb.2014-0468OC.
5. Subramanian, A.; Tamayo, P.; Mootha, V. K.; Mukherjee, S.; Ebert, B. L.; Gillette, M. A.; Paulovich, A.; Pomeroy, S. L.; Golub, T. R.; Lander, E. S.; Mesirov, J. P. Gene set enrichment analysis: a knowledge-based approach for interpreting genome-wide expression profiles. *Proc Natl Acad Sci U S A* **2005**, *102*, 15545–50, doi:10.1073/pnas.0506580102.
6. Didangelos, A.; Yin, X.; Mandal, K.; Baumert, M.; Jahangiri, M.; Mayr, M. Proteomics characterization of extracellular space components in the human aorta. *Mol Cell Proteomics* **2010**, *9*, 2048–62, doi:10.1074/mcp.M110.001693.
7. Decaris, M. L.; Gatmaitan, M.; FlorCruz, S.; Luo, F.; Li, K.; Holmes, W. E.; Hellerstein, M. K.; Turner, S. M.; Emson, C. L. Proteomic analysis of altered extracellular matrix turnover in bleomycin-induced pulmonary fibrosis. *Mol Cell Proteomics* **2014**, *13*, 1741–52, doi:10.1074/mcp.M113.037267.
8. Xiao, Y. Y.; Fan, P. J.; Lei, S. R.; Qi, M.; Yang, X. H. MiR-138/peroxisome proliferator-activated receptor beta signaling regulates human hypertrophic scar fibroblast proliferation and movement in vitro. *J Dermatol* **2015**, *42*, 485–95, doi:10.1111/1346-8138.12792.
9. Eskildsen, T.; Taipaleenmaki, H.; Stenvang, J.; Abdallah, B. M.; Ditzel, N.; Nossent, A. Y.; Bak, M.; Kauppinen, S.; Kassem, M. MicroRNA-138 regulates osteogenic differentiation of human stromal (mesenchymal) stem cells in vivo. *Proc Natl Acad Sci U S A* **2011**, *108*, 6139–44, doi:10.1073/pnas.1016758108.
10. Qu, B.; Xia, X.; Wu, H. H.; Tu, C. Q.; Pan, X. M. PDGF-regulated miRNA-138 inhibits the osteogenic differentiation of mesenchymal stem cells. *Biochem Biophys Res Commun* **2014**, *448*, 241–7, doi:10.1016/j.bbrc.2014.04.091.
11. Liu, X.; Wang, C.; Chen, Z.; Jin, Y.; Wang, Y.; Kolokythas, A.; Dai, Y.; Zhou, X. MicroRNA-138 suppresses epithelial-mesenchymal transition in squamous cell carcinoma cell lines. *Biochem J* **2011**, *440*, 23–31, doi:10.1042/BJ20111006.
12. Pandit, K. V.; Corcoran, D.; Yousef, H.; Yarlagadda, M.; Tzouvelekis, A.; Gibson, K. F.; Konishi, K.; Yousem, S. A.; Singh, M.; Handley, D.; Richards, T.; Selman, M.; Watkins, S. C.; Pardo, A.; Ben-Yehudah, A.; Bouros, D.; Eickelberg, O.; Ray, P.; Benos, P. V.; Kaminski, N. Inhibition and role of let-7d in idiopathic pulmonary fibrosis. *Am J Respir Crit Care Med* **2010**, *182*, 220–9, doi:10.1164/rccm.200911-1698OC.
13. Geraldo, M. V.; Yamashita, A. S.; Kimura, E. T. MicroRNA miR-146b-5p regulates signal transduction of TGF-beta by repressing SMAD4 in thyroid cancer. *Oncogene* **2012**, *31*, 1910–22, doi:10.1038/onc.2011.381.
14. Al-Ansari, M. M.; Aboussekhra, A. miR-146b-5p mediates p16-dependent repression of IL-6 and suppresses paracrine procarcinogenic effects of breast stromal fibroblasts. *Oncotarget* **2015**, *6*, 30006–16, doi:10.18632/oncotarget.4933.
15. Liu, Z.; Lu, C. L.; Cui, L. P.; Hu, Y. L.; Yu, Q.; Jiang, Y.; Ma, T.; Jiao, D. K.; Wang, D.; Jia, C. Y. MicroRNA-146a modulates TGF-beta1-induced phenotypic differentiation in human dermal fibroblasts by targeting SMAD4. *Arch Dermatol Res* **2012**, *304*, 195–202, doi:10.1007/s00403-011-1178-0.

16. He, Y.; Huang, C.; Sun, X.; Long, X. R.; Lv, X. W.; Li, J. MicroRNA-146a modulates TGF-beta1-induced hepatic stellate cell proliferation by targeting SMAD4. *Cell Signal* **2012**, *24*, 1923–30, doi:10.1016/j.cellsig.2012.06.003.
17. Morishita, Y.; Imai, T.; Yoshizawa, H.; Watanabe, M.; Ishibashi, K.; Muto, S.; Nagata, D. Delivery of microRNA-146a with polyethylenimine nanoparticles inhibits renal fibrosis in vivo. *Int J Nanomedicine* **2015**, *10*, 3475–88, doi:10.2147/IJN.S82587.
18. Pottier, N.; Maurin, T.; Chevalier, B.; Puissegur, M. P.; Lebrigand, K.; Robbe-Sermesant, K.; Bertero, T.; Lino Cardenas, C. L.; Courcot, E.; Rios, G.; Fourre, S.; Lo-Guidice, J. M.; Marcet, B.; Cardinaud, B.; Barbry, P.; Mari, B. Identification of keratinocyte growth factor as a target of microRNA-155 in lung fibroblasts: implication in epithelial-mesenchymal interactions. *PLoS One* **2009**, *4*, e6718, doi:10.1371/journal.pone.0006718.
19. Louafi, F.; Martinez-Nunez, R. T.; Sanchez-Elsner, T. MicroRNA-155 targets SMAD2 and modulates the response of macrophages to transforming growth factor- $\beta$ . *J Biol Chem* **2010**, *285*, 41328–36, doi:10.1074/jbc.M110.146852.
20. Kong, W.; Yang, H.; He, L.; Zhao, J. J.; Coppola, D.; Dalton, W. S.; Cheng, J. Q. MicroRNA-155 is regulated by the transforming growth factor beta/Smad pathway and contributes to epithelial cell plasticity by targeting RhoA. *Mol Cell Biol* **2008**, *28*, 6773–84, doi:10.1128/MCB.00941-08.
21. Gennarino, V. A.; D'Angelo, G.; Dharmalingam, G.; Fernandez, S.; Russolillo, G.; Sanges, R.; Mutarelli, M.; Belcastro, V.; Ballabio, A.; Verde, P.; Sardiello, M.; Banfi, S. Identification of microRNA-regulated gene networks by expression analysis of target genes. *Genome Res* **2012**, *22*, 1163–72, doi:10.1101/gr.130435.111.
22. Dakhllallah, D.; Batte, K.; Wang, Y.; Cantemir-Stone, C. Z.; Yan, P.; Nuovo, G.; Mikhail, A.; Hitchcock, C. L.; Wright, V. P.; Nana-Sinkam, S. P.; Piper, M. G.; Marsh, C. B. Epigenetic regulation of miR-17~92 contributes to the pathogenesis of pulmonary fibrosis. *Am J Respir Crit Care Med* **2013**, *187*, 397–405, doi:10.1164/rccm.201205-0888OC.
23. Lu, L.; Wang, J.; Lu, H.; Zhang, G.; Liu, Y.; Wang, J.; Zhang, Y.; Shang, H.; Ji, H.; Chen, X.; Duan, Y.; Li, Y. MicroRNA-130a and -130b enhance activation of hepatic stellate cells by suppressing PPARgamma expression: A rat fibrosis model study. *Biochem Biophys Res Commun* **2015**, *465*, 387–93, doi:10.1016/j.bbrc.2015.08.012.
24. Chen, Q. G.; Zhou, W.; Han, T.; Du, S. Q.; Li, Z. H.; Zhang, Z.; Shan, G. Y.; Kong, C. Z. MiR-345 suppresses proliferation, migration and invasion by targeting Smad1 in human prostate cancer. *J Cancer Res Clin Oncol* **2016**, *142*, 213–24, doi:10.1007/s00432-015-2016-0.
25. Petrocca, F.; Visone, R.; Onelli, M. R.; Shah, M. H.; Nicoloso, M. S.; de Martino, I.; Iliopoulos, D.; Piloizzi, E.; Liu, C. G.; Negrini, M.; Cavazzini, L.; Volinia, S.; Alder, H.; Ruco, L. P.; Baldassarre, G.; Croce, C. M.; Vecchione, A. E2F1-regulated microRNAs impair TGFbeta-dependent cell-cycle arrest and apoptosis in gastric cancer. *Cancer Cell* **2008**, *13*, 272–86, doi:10.1016/j.ccr.2008.02.013.
26. Smith, A. L.; Iwanaga, R.; Drasin, D. J.; Micalizzi, D. S.; Vartuli, R. L.; Tan, A. C.; Ford, H. L. The miR-106b-25 cluster targets Smad7, activates TGF-beta signaling, and induces EMT and tumor initiating cell characteristics downstream of Six1 in human breast cancer. *Oncogene* **2012**, *31*, 5162–71, doi:10.1038/onc.2012.11.
27. Qu, M. H.; Han, C.; Srivastava, A. K.; Cui, T.; Zou, N.; Gao, Z. Q.; Wang, Q. E. miR-93 promotes TGF-beta-induced epithelial-to-mesenchymal transition through downregulation of NEDD4L in lung cancer cells. *Tumour Biol* **2015**, doi:10.1007/s13277-015-4328-8.
28. Lyu, X.; Fang, W.; Cai, L.; Zheng, H.; Ye, Y.; Zhang, L.; Li, J.; Peng, H.; Cho, W. C.; Wang, E.; Marincola, F. M.; Yao, K.; Cai, H.; Li, J.; Li, X. TGFbetaR2 is a major target of miR-93 in nasopharyngeal carcinoma aggressiveness. *Mol Cancer* **2014**, *13*, 51, doi:10.1186/1476-4598-13-51.

29. Oak, S. R.; Murray, L.; Herath, A.; Sleeman, M.; Anderson, I.; Joshi, A. D.; Coelho, A. L.; Flaherty, K. R.; Toews, G. B.; Knight, D.; Martinez, F. J.; Hogaboam, C. M. A micro RNA processing defect in rapidly progressing idiopathic pulmonary fibrosis. *PLoS One* **2011**, *6*, e21253, doi:10.1371/journal.pone.0021253.
30. Chen, C.; Wu, C. Q.; Zhang, Z. Q.; Yao, D. K.; Zhu, L. Loss of expression of miR-335 is implicated in hepatic stellate cell migration and activation. *Exp Cell Res* **2011**, *317*, 1714–25, doi:10.1016/j.yexcr.2011.05.001.
31. Zhang, J.; Tu, Q.; Bonewald, L. F.; He, X.; Stein, G.; Lian, J.; Chen, J. Effects of miR-335-5p in modulating osteogenic differentiation by specifically downregulating Wnt antagonist DKK1. *J Bone Min. Res* **2011**, *26*, 1953–63, doi:10.1002/jbmr.377.
32. Lin, X.; Wu, L.; Zhang, Z.; Yang, R.; Guan, Q.; Hou, X.; Wu, Q. MiR-335-5p promotes chondrogenesis in mouse mesenchymal stem cells and is regulated through two positive feedback loops. *J Bone Min. Res* **2014**, *29*, 1575–85, doi:10.1002/jbmr.2163.
33. Milosevic, J.; Pandit, K.; Magister, M.; Rabinovich, E.; Ellwanger, D. C.; Yu, G.; Vuga, L. J.; Weksler, B.; Benos, P. V.; Gibson, K. F.; McMillan, M.; Kahn, M.; Kaminski, N. Profibrotic role of miR-154 in pulmonary fibrosis. *Am J Respir Cell Mol Biol* **2012**, *47*, 879–87, doi:10.1165/rcmb.2011-0377OC.
34. He, Y.; Huang, C.; Lin, X.; Li, J. MicroRNA-29 family, a crucial therapeutic target for fibrosis diseases. *Biochimie* **2013**, *95*, 1355–9, doi:10.1016/j.biochi.2013.03.010.
35. Montgomery, R. L.; Yu, G.; Latimer, P. A.; Stack, C.; Robinson, K.; Dalby, C. M.; Kaminski, N.; van Rooij, E. MicroRNA mimicry blocks pulmonary fibrosis. *EMBO Mol Med* **2014**, *6*, 1347–56, doi:10.15252/emmm.201303604.
36. Xiao, J.; Meng, X. M.; Huang, X. R.; Chung, A. C.; Feng, Y. L.; Hui, D. S.; Yu, C. M.; Sung, J. J.; Lan, H. Y. miR-29 inhibits bleomycin-induced pulmonary fibrosis in mice. *Mol Ther* **2012**, *20*, 1251–60, doi:10.1038/mt.2012.36.
37. Cushing, L.; Kuang, P. P.; Qian, J.; Shao, F.; Wu, J.; Little, F.; Thannickal, V. J.; Cardoso, W. V.; Lu, J. miR-29 is a major regulator of genes associated with pulmonary fibrosis. *Am J Respir Cell Mol Biol* **2011**, *45*, 287–94, doi:10.1165/rcmb.2010-0323OC.
38. Qin, W.; Chung, A. C.; Huang, X. R.; Meng, X. M.; Hui, D. S.; Yu, C. M.; Sung, J. J.; Lan, H. Y. TGF-beta/Smad3 signaling promotes renal fibrosis by inhibiting miR-29. *J Am Soc Nephrol* **2011**, *22*, 1462–74, doi:10.1681/ASN.2010121308.
39. Zhang, Y.; Huang, X. R.; Wei, L. H.; Chung, A. C.; Yu, C. M.; Lan, H. Y. miR-29b as a therapeutic agent for angiotensin II-induced cardiac fibrosis by targeting TGF-beta/Smad3 signaling. *Mol Ther* **2014**, *22*, 974–85, doi:10.1038/mt.2014.25.
40. van Rooij, E.; Sutherland, L. B.; Thatcher, J. E.; DiMaio, J. M.; Naseem, R. H.; Marshall, W. S.; Hill, J. A.; Olson, E. N. Dysregulation of microRNAs after myocardial infarction reveals a role of miR-29 in cardiac fibrosis. *Proc Natl Acad Sci U S A* **2008**, *105*, 13027–32, doi:10.1073/pnas.0805038105.
41. Roderburg, C.; Urban, G. W.; Bettermann, K.; Vucur, M.; Zimmermann, H.; Schmidt, S.; Janssen, J.; Koppe, C.; Knolle, P.; Castoldi, M.; Tacke, F.; Trautwein, C.; Luedde, T. Micro-RNA profiling reveals a role for miR-29 in human and murine liver fibrosis. *Hepatology* **2011**, *53*, 209–18, doi:10.1002/hep.23922.
42. Sekiya, Y.; Ogawa, T.; Yoshizato, K.; Ikeda, K.; Kawada, N. Suppression of hepatic stellate cell activation by microRNA-29b. *Biochem Biophys Res Commun* **2011**, *412*, 74–9, doi:10.1016/j.bbrc.2011.07.041.
43. Zhang, Y.; Wu, L.; Wang, Y.; Zhang, M.; Li, L.; Zhu, D.; Li, X.; Gu, H.; Zhang, C. Y.; Zen, K. Protective role of estrogen-induced miRNA-29 expression in carbon tetrachloride-induced mouse liver injury. *J Biol Chem* **2012**, *287*, 14851–62, doi:10.1074/jbc.M111.314922.
44. Maurer, B.; Stanczyk, J.; Jungel, A.; Akhmetshina, A.; Trenkmann, M.; Brock, M.; Kowal-Bielecka, O.; Gay, R. E.; Michel, B. A.; Distler, J. H.; Gay, S.; Distler, O. MicroRNA-29, a key regulator of collagen expression in systemic sclerosis. *Arthritis Rheum* **2010**, *62*, 1733–43, doi:10.1002/art.27443.

45. Cushing, L.; Kuang, P.; Lu, J. The role of miR-29 in pulmonary fibrosis. *Biochem Cell Biol* **2015**, *93*, 109–18, doi:10.1139/bcb-2014-0095.
46. Pandit, K. V.; Milosevic, J. MicroRNA regulatory networks in idiopathic pulmonary fibrosis. *Biochem Cell Biol* **2015**, *93*, 129–37, doi:10.1139/bcb-2014-0101.
47. Zhao, S.; Zhang, Y.; Zheng, X.; Tu, X.; Li, H.; Chen, J.; Zang, Y.; Zhang, J. Loss of MicroRNA-101 Promotes Epithelial to Mesenchymal Transition in Hepatocytes. *J Cell Physiol* **2015**, *230*, 2706–17, doi:10.1002/jcp.24995.
48. Tu, X.; Zhang, H.; Zhang, J.; Zhao, S.; Zheng, X.; Zhang, Z.; Zhu, J.; Chen, J.; Dong, L.; Zang, Y.; Zhang, J. MicroRNA-101 suppresses liver fibrosis by targeting the TGFbeta signalling pathway. *J Pathol* **2014**, *234*, 46–59, doi:10.1002/path.4373.
49. Li, P.; Li, J.; Chen, T.; Wang, H.; Chu, H.; Chang, J.; Zang, W.; Wang, Y.; Ma, Y.; Du, Y.; Zhao, G.; Zhang, G. Expression analysis of serum microRNAs in idiopathic pulmonary fibrosis. *Int J Mol Med* **2014**, *33*, 1554–62, doi:10.3892/ijmm.2014.1712.
50. Pan, Z.; Sun, X.; Shan, H.; Wang, N.; Wang, J.; Ren, J.; Feng, S.; Xie, L.; Lu, C.; Yuan, Y.; Zhang, Y.; Wang, Y.; Lu, Y.; Yang, B. MicroRNA-101 inhibited postinfarct cardiac fibrosis and improved left ventricular compliance via the FBJ osteosarcoma oncogene/transforming growth factor-beta1 pathway. *Circulation* **2012**, *126*, 840–50, doi:10.1161/CIRCULATIONAHA.112.094524.
51. Murakami, Y.; Toyoda, H.; Tanaka, M.; Kuroda, M.; Harada, Y.; Matsuda, F.; Tajima, A.; Kosaka, N.; Ochiya, T.; Shimotohno, K. The progression of liver fibrosis is related with overexpression of the miR-199 and 200 families. *PLoS One* **2011**, *6*, e16081, doi:10.1371/journal.pone.0016081.
52. Lino Cardenas, C. L.; Henaoui, I. S.; Courcot, E.; Roderburg, C.; Cauffiez, C.; Aubert, S.; Copin, M. C.; Wallaert, B.; Glowacki, F.; Dewaeles, E.; Milosevic, J.; Maurizio, J.; Tedrow, J.; Marcet, B.; Lo-Guidice, J. M.; Kaminski, N.; Barbry, P.; Luedde, T.; Perrais, M.; Mari, B.; Pottier, N. miR-199a-5p Is upregulated during fibrogenic response to tissue injury and mediates TGFbeta-induced lung fibroblast activation by targeting caveolin-1. *PLoS Genet* **2013**, *9*, e1003291, doi:10.1371/journal.pgen.1003291.
53. Ji, X.; Wu, B.; Fan, J.; Han, R.; Luo, C.; Wang, T.; Yang, J.; Han, L.; Zhu, B.; Wei, D.; Chen, J.; Ni, C. The Anti-fibrotic Effects and Mechanisms of MicroRNA-486-5p in Pulmonary Fibrosis. *Sci Rep* **2015**, *5*, 14131, doi:10.1038/srep14131.
54. Lu, C. H.; Hou, Q. R.; Deng, L. F.; Fei, C.; Xu, W. P.; Zhang, Q.; Wu, K. M.; Ning, B. F.; Xie, W. F.; Zhang, X. MicroRNA-370 Attenuates Hepatic Fibrogenesis by Targeting Smoothed. *Dig Sci* **2015**, *60*, 2038–48, doi:10.1007/s10620-015-3585-0.
